# Supplementary material
Source: PubMed Central journal article supplement (PMC4681590)
Supplement: NIHMS721868-supplement-Data_supplement_1.pdf [file NIHMS721868-supplement-Data_supplement_1.pdf]

**Supp. Table S1. List of *BRCA1* pathogenic mutations found in Asian populations.**

| <i>BRCA1</i> mutation<br>(nucleotide) | <i>BRCA1</i> mutation<br>(protein) | Exon    | Mutation type          | Location      | Ethnicity          | No. of<br>cases | Asian-<br>specific <sup>a</sup> | BIC<br>entries <sup>b</sup> | References/<br>Novel <sup>c</sup> |
|---------------------------------------|------------------------------------|---------|------------------------|---------------|--------------------|-----------------|---------------------------------|-----------------------------|-----------------------------------|
| Duplication of exon 1 to exon 2       |                                    | 1 to 2  | Large duplication      | Oman          | Omani              | 2               |                                 | n/a                         | [1]                               |
| Deletion of exon 1 to exon 2          |                                    | 1 to 2  | Large deletion         | Oman          | Omani              | 2               |                                 | n/a                         | [1]                               |
|                                       |                                    |         |                        | Turkey        | Turkish            | 17              |                                 |                             | [2]                               |
| Deletion of exon 1 to exon 3          |                                    | 1 to 3  | Large deletion         | Stanford (US) | Filipino           | 1               |                                 | n/a                         |                                   |
| Deletion of exon 1 to exon 8          |                                    | 1 to 8  | Large deletion         | Hong Kong     | Chinese            | 1               |                                 | n/a                         |                                   |
| Deletion of exon 1 to exon 9          |                                    | 1 to 9  | Large deletion         | Japan         | Japanese           | 1               |                                 | n/a                         |                                   |
| Deletion of exon 1 to exon 12         |                                    | 1 to 12 | Large deletion         | Hong Kong     | Chinese            | 1               |                                 | n/a                         | [3]                               |
| Deletion of exon 1 to exon 14         |                                    | 1 to 14 | Large deletion         | Malaysia      | Chinese            | 1               |                                 | n/a                         | [4]                               |
| c.34C>T                               | p.Gln12*                           | 2       | Nonsense               | Hong Kong     | Chinese            | 1               |                                 | 13                          |                                   |
| c.61delA                              | p.Ile21Serfs*2                     | 2       | Deletion - frameshift  | Malaysia      | Indian             | 1               | Asian                           | 1                           | [5]                               |
| c.62_63insT                           | p.Glu23Argfs*18                    | 2       | Insertion - frameshift | Iran          | Iranian            | 1               |                                 | none                        | [6]                               |
| c.66dupA                              | p.Glu23Argfs*18                    | 2       | Insertion - frameshift | Pakistan      | Pakistani, Punjabi | 4               |                                 | 30                          | [7, 8]                            |
|                                       |                                    |         |                        | Malaysia      | Chinese            | 1               |                                 |                             | [5]                               |
|                                       |                                    |         |                        | Vietnam       | Vietnamese         | 1               |                                 |                             | [9]                               |
|                                       |                                    |         |                        | Hong Kong     | Chinese            | 1               |                                 |                             |                                   |
|                                       |                                    |         |                        | Turkey        | Turkish            | 1               |                                 |                             | [10]                              |
|                                       |                                    |         |                        | Korea         | Korean             | 1               |                                 |                             | [11]                              |
|                                       |                                    |         |                        | Stanford (US) | Chinese            | 1               |                                 |                             |                                   |
| c.68_69delAG                          | p.Glu23Valfs*17                    | 2       | Deletion - frameshift  | Malaysia      | Indian             | 3               |                                 | 1988                        | [5]                               |
|                                       |                                    |         |                        | Singapore     | Indian             | 2               |                                 |                             | [12]                              |
|                                       |                                    |         |                        | India         | Indian             | 15              |                                 |                             | [13-16]                           |
|                                       |                                    |         |                        | Pakistan      | Pathan, Punjabi    | 3               |                                 |                             | [7, 8]                            |
|                                       |                                    |         |                        | Iran          | Iranian            | 1               |                                 |                             | [6]                               |
|                                       |                                    |         |                        | Iraq          | Iraqi              | 1               |                                 |                             | [17]                              |
|                                       |                                    |         |                        | Syria         | Syrian             | 1               |                                 |                             | [17]                              |
|                                       |                                    |         |                        | Turkey        | Turkish            | 1               |                                 |                             | [18]                              |
|                                       |                                    |         |                        | Yemen         | Yemenite           | 2               |                                 |                             | [17]                              |
| c.71G>A                               | p.Cys24Tyr                         | 2       | Missense               | Japan         | Japanese           | 1               |                                 | 1                           |                                   |
| c.80+1G>T                             |                                    | IVS2    | Intervening sequence   | Korea         | Korean             | 1               |                                 | 1                           |                                   |
| Deletion of exon 3                    |                                    | 3       | Large deletion         | Malaysia      | Indian             | 3               |                                 | n/a                         |                                   |
| c.131G>T                              | p.Cys44Phe                         | 3       | Missense               | Lebanon       | Lebanese           | 2               |                                 | 9                           | [19]                              |

| <b>BRCA1 mutation (nucleotide)</b>               | <b>BRCA1 mutation (protein)</b> | <b>Exon</b> | <b>Mutation type</b>  | <b>Location</b>  | <b>Ethnicity</b>  | <b>No. of cases</b> | <b>Asian-specific <sup>a</sup></b> | <b>BIC entries <sup>b</sup></b> | <b>References/ Novel <sup>c</sup></b> |
|--------------------------------------------------|---------------------------------|-------------|-----------------------|------------------|-------------------|---------------------|------------------------------------|---------------------------------|---------------------------------------|
| c.134+1G>T                                       |                                 | IVS3        | Intervening sequence  | Malaysia         | Chinese           | 1                   | Asian                              | 1                               | [5]                                   |
| c.134+2delT                                      |                                 | IVS3        | Intervening sequence  | Malaysia         | Chinese           | 1                   | Asian                              | 1                               | [5]                                   |
| c.134+2T>G                                       |                                 | IVS3        | Intervening sequence  | China            | Chinese           | 1                   |                                    | 1                               | [20]                                  |
| c.135-1G>C                                       |                                 | IVS4        | Intervening sequence  | Malaysia         | Indian            | 3                   | Asian                              | 1                               | [5]                                   |
| c.135-1G>T                                       |                                 | IVS4        | Intervening sequence  | Pakistan         | Punjabi           | 1                   |                                    | 30                              | [8]                                   |
| r.135_441dup;<br>Duplication of exon 5 to exon 7 | p.Gln148Ilefs*20                | 5 to 7      | Large duplication     | Stanford (US)    | Chinese           | 1                   |                                    | n/a                             |                                       |
| Duplication of exon 5 to exon 9                  |                                 | 5 to 9      | Large duplication     | Turkey           | Turkish           | 1                   |                                    | n/a                             | [2]                                   |
| Deletion of exon 5 to exon 24                    |                                 | 5 to 24     | Large deletion        | Los Angeles (US) | Japanese          | 1                   |                                    | n/a                             |                                       |
| c.150delA                                        | p.Lys50Asnfs*19                 | 5           | Deletion - frameshift | Malaysia         | Indian            | 1                   | Asian                              | 1                               |                                       |
| c.178_179delCA                                   | p.Gln60Valfs*5                  | 5           | Deletion - frameshift | India            | Indian            | 1                   |                                    | none                            | [13]                                  |
| c.178C>T                                         | p.Gln60*                        | 5           | Nonsense              | Japan            | Japanese          | 1                   |                                    | 4                               |                                       |
| c.181T>G                                         | p.Cys61Gly                      | 5           | Missense              | Japan            | Japanese          | 1                   |                                    | 230                             | [21]                                  |
|                                                  |                                 |             |                       | Israel           | Non-Ashkenazi Jew | 1                   |                                    |                                 | [22]                                  |
| c.188T>A                                         | p.Leu63*                        | 5           | Nonsense              | Japan            | Japanese          | 10                  |                                    | 6                               | [23]                                  |
|                                                  | p.Cys64Arg                      | 5           | Missense              | Japan            | Japanese          | 1                   |                                    | n/a                             |                                       |
| c.212+1G>T                                       | p.Cys64*                        | IVS5        | Intervening sequence  | Hong Kong        | Chinese           | 1                   |                                    | 4                               | [24]                                  |
| c.213-12A>G                                      |                                 | IVS5        | Intervening sequence  | Korea            | Korean            | 1                   |                                    | 25                              |                                       |
|                                                  |                                 |             |                       | Malaysia         | Chinese           | 1                   |                                    |                                 | [5]                                   |
|                                                  |                                 |             |                       | Stanford (US)    | Filipino          | 1                   |                                    |                                 |                                       |
| c.280C>T                                         | p.Gln94*                        | 6           | Nonsense              | Hong Kong        | Chinese           | 1                   |                                    | none                            | Novel                                 |
| c.302-2A>C                                       |                                 | IVS6        | Intervening sequence  | Korea            | Korean            | 1                   | Asian                              | 1                               | [11]                                  |
| c.321delT                                        | p.Phe107Leufs*12                | 7           | Deletion - frameshift | Los Angeles (US) | Japanese          | 1                   |                                    | 1                               |                                       |
| c.384_385delGGinsC                               | p.Met128Ilefs*35                | 7           | Frameshift            | Korea            | Korean            | 1                   |                                    | none                            | Novel                                 |
| c.390C>A                                         | p.Tyr130*                       | 7           | Nonsense              | Korea            | Korean            | 27                  | Asian                              | 1                               | [25]                                  |
|                                                  |                                 |             |                       | Japan            | Japanese          | 1                   |                                    |                                 | [23]                                  |
|                                                  |                                 |             |                       | Stanford (US)    | Chinese, Korean   | 2                   |                                    |                                 |                                       |
| c.424C>G                                         | p.Pro142Ala                     | 7           | Missense              | Lebanon          | Lebanese          | 1                   |                                    | none                            | [19]                                  |
| c.431delA                                        | p.Asn144fs                      | 7           | Deletion - frameshift | Pakistan         | Punjabi           | 1                   |                                    | none                            | [8]                                   |
| c.442-15del110                                   | Stop 182                        | IVS7        | Intervening sequence  | Singapore        | Chinese           | 2                   |                                    | none                            | [12]                                  |
| c.456_457delCA                                   | p.Ser153Cysfs*5                 | 8           | Deletion - frameshift | Japan            | Japanese          | 1                   |                                    | 1                               |                                       |
| c.463C>T                                         | p.Gln115*                       | 8           | Nonsense              | China            | Chinese           | 1                   |                                    | none                            | [20]                                  |

| <b>BRCA1 mutation<br/>(nucleotide)</b> | <b>BRCA1 mutation<br/>(protein)</b> | <b>Exon</b> | <b>Mutation type</b>   | <b>Location</b>   | <b>Ethnicity</b> | <b>No. of<br/>cases</b> | <b>Asian-<br/>specific <sup>a</sup></b> | <b>BIC<br/>entries <sup>b</sup></b> | <b>References/<br/>Novel <sup>c</sup></b> |
|----------------------------------------|-------------------------------------|-------------|------------------------|-------------------|------------------|-------------------------|-----------------------------------------|-------------------------------------|-------------------------------------------|
| c.470_471delCT                         | p.Ser157*                           | 8           | Deletion - frameshift  | Hong Kong         | Chinese          | 10                      |                                         | 10                                  | [24, 26]                                  |
|                                        |                                     |             |                        | Japan             | Japanese         | 1                       |                                         |                                     | [27]                                      |
|                                        |                                     |             |                        | Malaysia          | Chinese          | 3                       |                                         |                                     | [5]                                       |
|                                        |                                     |             |                        | Pakistan          | Punjabi          | 1                       |                                         |                                     | [8]                                       |
|                                        |                                     |             |                        | Stanford (US)     | Chinese          | 1                       |                                         |                                     |                                           |
| c.502A>T                               | p.Lys168*                           | 8           | Nonsense               | Hong Kong         | Chinese          | 1                       |                                         | none                                | Novel                                     |
| c.505C>T                               | p.Gln169*                           | 8           | Nonsense               | Malaysia          | Malay            | 1                       |                                         | 5                                   |                                           |
| c.514C>T                               | p.Gln172*                           | 8           | Nonsense               | Hong Kong         | Chinese          | 1                       | Asian                                   | 2                                   |                                           |
| c.616C>T                               | p.Gln206*                           | 10          | Nonsense               | China             | Chinese          | 1                       |                                         | none                                | [20]                                      |
| c.625_626ins20                         | Stop 240                            | 10          | Insertion - frameshift | Thailand          | Thai             | 1                       | Asian                                   | 1                                   | [28]                                      |
| Deletion of exon 11                    |                                     | 11          | Large deletion         | Turkey            | Turkish          | 2                       |                                         | n/a                                 | [2]                                       |
| c.737T>G                               | p.Leu246Trp                         | 11          | Missense               | Sri Lanka         | Sri Lankan       | 1                       |                                         | none                                | [29]                                      |
| c.775delG                              | p.Glu259Lysfs*39                    | 11          | Deletion - frameshift  | Pakistan          | Muhajir          | 1                       | Asian                                   | 1                                   | [7]                                       |
| c.829_830delAA                         | p.Asn277Tyrfs*9                     | 11          | Deletion - frameshift  | Malaysia          | Indian           | 1                       |                                         | none                                | Novel                                     |
| c.850C>T                               | p.Gln284*                           | 11          | Nonsense               | Malaysia          | Indian           | 1                       |                                         | none                                | Novel                                     |
| c.895_896delGT                         | p.Val299Argfs*5                     | 11          | Deletion - frameshift  | Pakistan          | Muhajir          | 1                       | Asian                                   | 3                                   | [7]                                       |
| c.898G>T                               | p.Glu300*                           | 11          | Nonsense               | Singapore         | Chinese          | 1                       |                                         | none                                | Novel                                     |
| c.909delA                              | p.Glu303Aspfs*11                    | 11          | Deletion - frameshift  | New Delhi (India) | Indian           | 1                       |                                         | none                                | [30]                                      |
| c.922_923delAG                         | p.Ser308Glnfs*11                    | 11          | Deletion - frameshift  | Korea             | Korean           | 7                       | Asian                                   | 2                                   |                                           |
| c.922_924delAGCinsT                    | p.Ser308*                           | 11          | Frameshift             | Korea             | Korean           | 2                       |                                         | none                                | [25]                                      |
| c.928C>T                               | p.Gln310*                           | 11          | Nonsense               | Korea             | Korean           | 4                       |                                         | none                                | [11]                                      |
| c.929_933delAGCCT                      | p.Gln310Argfs*8                     | 11          | Deletion - frameshift  | Hong Kong         | Chinese          | 1                       |                                         | none                                | Novel                                     |
| c.964delG                              | p.Ala322Leufs*19                    | 11          | Deletion - frameshift  | Hong Kong         | Chinese          | 1                       | Asian                                   | 1                                   |                                           |
|                                        |                                     |             |                        | Malaysia          | Chinese          | 1                       |                                         |                                     |                                           |
| c.969_970insC                          | p.Ser324Glnfs*2                     | 11          | Insertion - frameshift | Iran              | Iranian          | 3                       |                                         | none                                | [31]                                      |
| c.981_982delAT                         | p.Cys328*                           | 11          | Deletion - frameshift  | Hong Kong         | Chinese          | 1                       |                                         | 9                                   | [24]                                      |
|                                        |                                     |             |                        | Malaysia          | Chinese          | 1                       |                                         |                                     | [5]                                       |
|                                        |                                     |             |                        | Korea             | Korean           | 3                       |                                         |                                     |                                           |
|                                        |                                     |             |                        | China             | Chinese          | 4                       |                                         |                                     | [20]                                      |
| c.1008delA                             | p.Glu337Lysfs*4                     | 11          | Deletion - frameshift  | Pakistan          | Punjabi          | 1                       |                                         | none                                | [7]                                       |
| c.1016delA                             | p.Lys339Argfs*2                     | 11          | Deletion - frameshift  | Hong Kong         | Chinese          | 1                       |                                         | 2                                   | [24]                                      |
|                                        |                                     |             |                        | Iran              | Iranian          | 3                       |                                         |                                     |                                           |

| <b><i>BRCA1</i> mutation<br/>(nucleotide)</b> | <b><i>BRCA1</i> mutation<br/>(protein)</b> | <b>Exon</b> | <b>Mutation type</b>   | <b>Location</b> | <b>Ethnicity</b> | <b>No. of<br/>cases</b> | <b>Asian-<br/>specific <sup>a</sup></b> | <b>BIC<br/>entries <sup>b</sup></b> | <b>References/<br/>Novel <sup>c</sup></b> |
|-----------------------------------------------|--------------------------------------------|-------------|------------------------|-----------------|------------------|-------------------------|-----------------------------------------|-------------------------------------|-------------------------------------------|
|                                               |                                            |             |                        | Canada          | Chinese          | 1                       |                                         |                                     |                                           |
| c.1016dupA                                    | p.Val340Glyfs*6                            | 11          | Insertion - frameshift | China           | Chinese          | 1                       |                                         | 49                                  | [32]                                      |
| c.1054delG                                    | p.Glu352Asnfs*22                           | 11          | Deletion - frameshift  | Korea           | Korean           | 2                       |                                         | none                                | Novel                                     |
| c.1054G>T                                     | p.Glu352*                                  | 11          | Nonsense               | Japan           | Japanese         | 1                       |                                         | 5                                   | [21]                                      |
|                                               |                                            |             |                        | Malaysia        | Indian           | 1                       |                                         |                                     | [5]                                       |
| c.1066C>T                                     | p.Gln356*                                  | 11          | Nonsense               | Hong Kong       | Chinese          | 1                       |                                         | 2                                   | [26]                                      |
| c.1104delA                                    | p.Asp369Metfs*5                            | 11          | Deletion - frameshift  | Malaysia        | Chinese          | 1                       |                                         | none                                | Novel                                     |
| c.1112delC                                    | p.Pro371Leufs*3                            | 11          | Deletion - frameshift  | Japan           | Japanese         | 1                       |                                         | none                                | [23]                                      |
| c.1116G>A                                     | p.Trp372*                                  | 11          | Nonsense               | China           | Chinese          | 1                       |                                         | 6                                   | [32]                                      |
| c.1120delA                                    | p.Thr374Hisfs*2                            | 11          | Deletion - frameshift  | Japan           | Japanese         | 1                       |                                         | none                                | [33]                                      |
| c.1204G>T                                     | p.Glu402*                                  | 11          | Nonsense               | Malaysia        | Malay            | 2                       | Asian                                   | 3                                   | [5]                                       |
| c.1224delA                                    | p.Val409*                                  | 11          | Deletion - frameshift  | Japan           | Japanese         | 1                       |                                         | none                                | Novel                                     |
|                                               | p.Glu421*                                  | 11          | Nonsense               | Stanford (US)   | Asian            | 1                       |                                         | n/a                                 |                                           |
| c.1267insAT                                   | p.Ser423fs                                 | 11          | Insertion - frameshift | Thailand        | Thai             | 1                       |                                         | none                                | [34]                                      |
| c.1279G>T                                     | p.Glu427*                                  | 11          | Nonsense               | China           | Chinese          | 1                       |                                         | none                                | [20]                                      |
| c.1287dupA                                    | p.Asp430Argfs*6                            | 11          | Insertion - frameshift | Japan           | Japanese         | 1                       |                                         | 7                                   |                                           |
| c.1357delG                                    | p.Glu453Argfs*22                           | 11          | Deletion - frameshift  | Pakistan        | Punjabi          | 1                       |                                         | none                                | [7]                                       |
| c.1392delC                                    | p.Tyr465Ilefs*10                           | 11          | Deletion - frameshift  | Singapore       | Chinese          | 1                       |                                         | none                                | [35]                                      |
| c.1405delG                                    | p.Ala469Glnfs*6                            | 11          | Deletion - frameshift  | Singapore       | Chinese          | 1                       |                                         | none                                | [35]                                      |
| c.1465G>T                                     | p.Glu489*                                  | 11          | Nonsense               | China           | Chinese          | 3                       |                                         | none                                | [36]                                      |
| c.1471C>T                                     | p.Gln491*                                  | 11          | Nonsense               | Pakistan        | Punjabi          | 1                       |                                         | 4                                   | [8]                                       |
| c.1480C>T                                     | p.Gln494*                                  | 11          | Nonsense               | Korea           | Korean           | 3                       |                                         | 5                                   | [11]                                      |
| c.1501_1504delAAAAT                           | p.Lys501*                                  | 11          | Deletion - frameshift  | Pakistan        | Muhajir          | 1                       | Asian                                   | 1                                   | [7]                                       |
| c.1504_1508delTTAAA                           | p.Leu502Alafs*2                            | 11          | Deletion - frameshift  | Korea           | Korean           | 2                       |                                         | 29                                  |                                           |
|                                               |                                            |             |                        | Turkey          | Turkish          | 1                       |                                         |                                     | [10]                                      |
|                                               |                                            |             |                        | Stanford (US)   | Filipino         | 1                       |                                         |                                     |                                           |
| c.1507A>G                                     | p.Lys503*                                  | 11          | Nonsense               | Japan           | Japanese         | 1                       |                                         | none                                | [23]                                      |
| c.1511dupG                                    | p.Lys505*                                  | 11          | Insertion - frameshift | Korea           | Korean           | 2                       | Asian                                   | 2                                   | [25]                                      |
| c.1582_1588delACTCCTG                         | p.Thr528Lysfs*2                            | 11          | Deletion - frameshift  | Pakistan        | Pakistani        | 1                       | Asian                                   | 2                                   | [37]                                      |
| c.1612C>T                                     | p.Gln538*                                  | 11          | Nonsense               | Pakistan        | Punjabi          | 1                       |                                         | 3                                   | [8]                                       |
| c.1651_1652insT                               | p.Ser551*                                  | 11          | Insertion - frameshift | Pakistan        | Balouchi         | 1                       |                                         | none                                | [7]                                       |
| c.1660G>T                                     | p.Glu554*                                  | 11          | Nonsense               | China           | Chinese          | 1                       |                                         | none                                | [32]                                      |

| <b><i>BRCAl</i> mutation<br/>(nucleotide)</b> | <b><i>BRCAl</i> mutation<br/>(protein)</b> | <b>Exon</b> | <b>Mutation type</b>   | <b>Location</b>  | <b>Ethnicity</b> | <b>No. of<br/>cases</b> | <b>Asian-<br/>specific <sup>a</sup></b> | <b>BIC<br/>entries <sup>b</sup></b> | <b>References/<br/>Novel <sup>c</sup></b> |
|-----------------------------------------------|--------------------------------------------|-------------|------------------------|------------------|------------------|-------------------------|-----------------------------------------|-------------------------------------|-------------------------------------------|
|                                               | p.Gln563*                                  | 11          | Nonsense               | Stanford (US)    | Filipino         | 2                       |                                         | n/a                                 |                                           |
| c.1728dupA                                    | p.Glu577Argfs*9                            | 11          | Insertion - frameshift | Stanford (US)    | Taiwanese        | 1                       |                                         | none                                | Novel                                     |
| c.1741A>T                                     | p.Lys581*                                  | 11          | Nonsense               | Iran             | Iranian          | 1                       |                                         | none                                | [38]                                      |
| c.1793T>G                                     | p.Leu598*                                  | 11          | Nonsense               | Pakistan         | Muhajir          | 1                       | Asian                                   | 1                                   | [7]                                       |
| c.1831delC                                    | p.Leu611*                                  | 11          | Deletion - frameshift  | Korea            | Korean           | 2                       |                                         | none                                | [11]                                      |
| c.1837delA                                    | p.Arg613Glyfs*13                           | 11          | Deletion - frameshift  | Pakistan         | Punjabi          | 1                       | Asian                                   | 1                                   | [14]                                      |
| c.1881_1884delCAGT                            | p.Ser628Glu fs*3                           | 11          | Deletion - frameshift  | Singapore        | Chinese          | 1                       |                                         | 3                                   | [12]                                      |
|                                               |                                            |             |                        | Stanford (US)    | Malay            | 1                       |                                         |                                     |                                           |
| c.1921dupA                                    | p.Ile641Asnfs*2                            | 11          | Insertion - frameshift | Los Angeles (US) | Indian           | 1                       |                                         | none                                | Novel                                     |
| c.1922_1923insA                               | p.Asp642*                                  | 11          | Insertion - frameshift | Pakistan         | Punjabi          | 2                       |                                         | none                                | [7]                                       |
| c.1936delA                                    | p.Ser646Alafs*5                            | 11          | Deletion - frameshift  | Korea            | Korean           | 2                       |                                         | none                                | [11]                                      |
| c.1952dupA                                    | p.Lys652Glu fs*21                          | 11          | Insertion - frameshift | China            | Chinese          | 1                       |                                         | 2                                   | [32]                                      |
| c.1961delA                                    | p.Lys654Serfs*47                           | 11          | Deletion - frameshift  | Korea            | Korean           | 7                       |                                         | 32                                  | [11]                                      |
|                                               |                                            |             |                        | China            | Chinese          | 1                       |                                         |                                     | [39]                                      |
| c.1961dupA                                    | p.Tyr655Valfs*18                           | 11          | Insertion - frameshift | Hong Kong        | Chinese          | 1                       |                                         | 9                                   | [24]                                      |
|                                               |                                            |             |                        | Pakistan         | Pashtun          | 3                       |                                         |                                     | [7]                                       |
| c.1996delC                                    | p.Leu666Tyrfs*35                           | 11          | Deletion - frameshift  | Malaysia         | Malay            | 1                       |                                         | 1                                   |                                           |
| c.2010_2011insTG                              | p.Gly671Trpfs*32                           | 11          | Insertion - frameshift | China            | Chinese          | 1                       |                                         | none                                | [40]                                      |
| c.2021delC                                    | p.Pro674Leufs*27                           | 11          | Deletion - frameshift  | Turkey           | Turkish          | 1                       |                                         | none                                | [10]                                      |
|                                               | p.Lys679*                                  | 11          | Nonsense               | Stanford (US)    | Asian/Caucasian  | 1                       |                                         | n/a                                 |                                           |
| c.2059C>T                                     | p.Gln687*                                  | 11          | Nonsense               | Malaysia         | Malay            | 1                       |                                         | 1                                   |                                           |
| c.2110_2111delAA                              | p.Asn704Cysfs*7                            | 11          | Deletion - frameshift  | China            | Chinese          | 1                       |                                         | 3                                   | [20]                                      |
| c.2147delG                                    | p.Ser716Metfs*20                           | 11          | Deletion - frameshift  | Pakistan         | Punjabi          | 1                       |                                         | none                                | [7]                                       |
| c.2158G>T                                     | p.Glu720*                                  | 11          | Nonsense               | Israel           | Druze            | 1                       |                                         | 2                                   | [22]                                      |
| c.2166delC                                    | p.Asn723Ilefs*13                           | 11          | Deletion - frameshift  | Hong Kong        | Chinese          | 1                       |                                         | none                                | Novel                                     |
| c.2216_2217delAA                              | p.Lys739Serfs*3                            | 11          | Deletion - frameshift  | Iran             | Iranian          | 1                       |                                         | none                                | [6]                                       |
| c.2248_2252delCTCAT                           | p.Leu750Valfs*10                           | 11          | Deletion - frameshift  | China            | Chinese          | 1                       |                                         | none                                | [32]                                      |
| c.2253_2254delGT                              | p.Met751Ilefs*10                           | 11          | Deletion - frameshift  | Hong Kong        | Chinese          | 2                       | Asian                                   | 1                                   | [41]                                      |
| c.2269delG                                    | p.Val757Phefs*8                            | 11          | Deletion - frameshift  | Bangladesh       | Bangladeshi      | 1                       |                                         | 7                                   |                                           |
|                                               |                                            |             |                        | Pakistan         | Muhajir, Pathan  | 2                       |                                         |                                     | [7, 8]                                    |
|                                               |                                            |             |                        | Stanford (US)    | Japanese         | 1                       |                                         |                                     |                                           |
| c.2275C>T                                     | p.Gln759*                                  | 11          | Nonsense               | China            | Chinese          | 1                       |                                         | 1                                   | [39]                                      |

| <b>BRCA1 mutation<br/>(nucleotide)</b> | <b>BRCA1 mutation<br/>(protein)</b> | <b>Exon</b> | <b>Mutation type</b>   | <b>Location</b> | <b>Ethnicity</b>    | <b>No. of<br/>cases</b> | <b>Asian-<br/>specific <sup>a</sup></b> | <b>BIC<br/>entries <sup>b</sup></b> | <b>References/<br/>Novel <sup>c</sup></b> |
|----------------------------------------|-------------------------------------|-------------|------------------------|-----------------|---------------------|-------------------------|-----------------------------------------|-------------------------------------|-------------------------------------------|
| c.2296_2297delAG                       | p.Ser766*                           | 11          | Deletion - frameshift  | Korea           | Korean              | 5                       |                                         | 3                                   | [11]                                      |
| c.2299delA                             | p.Ser767Alafs*25                    | 11          | Deletion - frameshift  | China           | Chinese             | 1                       |                                         | 6                                   | [32]                                      |
| c.2311_2312insC                        | p.Leu771Serfs*6                     | 11          | Insertion - frameshift | Singapore       | Chinese             | 1                       |                                         | none                                | [35]                                      |
| c.2354T>A                              | p.Leu785*                           | 11          | Nonsense               | Korea           | Korean              | 1                       |                                         | none                                | [11]                                      |
| c.2357delT                             | p.Leu786Argfs*6                     | 11          | Deletion - frameshift  | Turkey          | Turkish             | 1                       |                                         | none                                | [10]                                      |
| c.2389_2390delGA                       | p.Glu797Thrfs*3                     | 11          | Deletion - frameshift  | Japan           | Japanese            | 1                       |                                         | 4                                   | [27]                                      |
| c.2506delG                             | p.Glu836Lysfs*10                    | 11          | Deletion - frameshift  | Stanford (US)   | Chinese             | 1                       |                                         | none                                | Novel                                     |
| c.2513delA                             | p.Asn838Thrfs*8                     | 11          | Deletion - frameshift  | Japan           | Japanese            | 1                       | Asian                                   | 1                                   |                                           |
|                                        | p.Tyr856His                         | 11          | Missense               | Stanford (US)   | Chinese             | 1                       |                                         | n/a                                 |                                           |
| c.2572C>T                              | p.Gln858*                           | 11          | Nonsense               | China           | Chinese             | 1                       |                                         | none                                | [20]                                      |
| c.2577_2578insTT                       | p.Thr860Leufs*34                    | 11          | Insertion - frameshift | Hong Kong       | Chinese             | 1                       |                                         | none                                | Novel                                     |
| c.2603C>A                              | p.Ser868*                           | 11          | Nonsense               | China           | Chinese             | 1                       |                                         | none                                | [20]                                      |
| c.2611_2612delCC                       | p.Pro871Valfs*31                    | 11          | Deletion - frameshift  | Japan           | Japanese            | 1                       |                                         | 1                                   | [21]                                      |
| c.2617dupT                             | p.Ser873Phefs*30                    | 11          | Insertion - frameshift | Singapore       | Chinese             | 1                       |                                         | 1                                   | [35]                                      |
| c.2635G>T                              | p.Glu879*                           | 11          | Nonsense               | Hong Kong       | Chinese             | 1                       | Asian                                   | 4                                   | [24]                                      |
|                                        |                                     |             |                        | Malaysia        | Malay               | 2                       |                                         |                                     | [42]                                      |
|                                        |                                     |             |                        | Singapore       | Chinese             | 1                       |                                         |                                     |                                           |
| c.2671delT                             | p.Ser891Profs*2                     | 11          | Deletion - frameshift  | China           | Chinese             | 1                       |                                         | none                                | [20]                                      |
| c.2679_2682delGAAA                     | p.Lys893Asnfs*106                   | 11          | Deletion - frameshift  | Japan           | Japanese            | 1                       |                                         | 40                                  |                                           |
| c.2686delA                             | p.Ser896Valfs*104                   | 11          | Deletion - frameshift  | Japan           | Japanese            | 1                       |                                         | 1                                   |                                           |
| c.2694dupA                             | p.Val899Serfs*4                     | 11          | Insertion - frameshift | China           | Chinese             | 1                       |                                         | 1                                   | [32]                                      |
| c.2695delG                             | p.Val899Serfs*101                   | 11          | Deletion - frameshift  | Hong Kong       | Chinese             | 1                       |                                         | none                                | Novel                                     |
| c.2726dupA                             | p.Asn909Lysfs*6                     | 11          | Insertion - frameshift | Malaysia        | Malay               | 1                       | Asian                                   | 5                                   |                                           |
|                                        |                                     |             |                        | Singapore       | Malay               | 9                       |                                         |                                     | [43]                                      |
| c.2740G>T                              | p.Glu914*                           | 11          | Nonsense               | Korea           | Korean              | 2                       |                                         | 1                                   |                                           |
| c.2798_2799delIGT                      | p.Gly933Alafs*4                     | 11          | Deletion - frameshift  | China           | Chinese             | 1                       |                                         | none                                | [20]                                      |
| c.2800C>T                              | p.Gln934*                           | 11          | Nonsense               | Japan           | Japanese            | 2                       | Asian                                   | 4                                   | [23]                                      |
|                                        |                                     |             |                        | California (US) | Asian               | 1                       |                                         |                                     | [44]                                      |
| c.2864C>A                              | p.Ser955*                           | 11          | Nonsense               | India           | Indian              | 1                       |                                         | 4                                   | [13]                                      |
| c.2871_2872insA                        | p.Phe958Ilefs*13                    | 11          | Insertion - frameshift | Turkey          | Turkish             | 1                       |                                         | none                                | [45]                                      |
| c.2934T>G                              | p.Tyr978*                           | 11          | Nonsense               | Israel          | Jew of Asian origin | 23                      |                                         | 25                                  | [46]                                      |
| c.2967delT                             | p.Phe989Leufs*11                    | 11          | Deletion - frameshift  | Sri Lanka       | Sri Lankan          | 1                       |                                         | none                                | [29]                                      |

| <b>BRCA1 mutation<br/>(nucleotide)</b> | <b>BRCA1 mutation<br/>(protein)</b> | <b>Exon</b> | <b>Mutation type</b>   | <b>Location</b>                       | <b>Ethnicity</b>                | <b>No. of<br/>cases</b> | <b>Asian-<br/>specific <sup>a</sup></b> | <b>BIC<br/>entries <sup>b</sup></b> | <b>References/<br/>Novel <sup>c</sup></b> |
|----------------------------------------|-------------------------------------|-------------|------------------------|---------------------------------------|---------------------------------|-------------------------|-----------------------------------------|-------------------------------------|-------------------------------------------|
| c.2981delG                             | p.Cys994Leufs*6                     | 11          | Deletion - frameshift  | Korea                                 | Korean                          | 3                       |                                         | none                                | Novel                                     |
| c.3008_3009delTT                       | p.Phe1003*                          | 11          | Deletion - frameshift  | Japan                                 | Japanese                        | 1                       |                                         | 5                                   |                                           |
| c.3076_3077ins76                       | Stop 1029                           | 11          | Insertion - frameshift | Malaysia                              | Chinese                         | 1                       |                                         | none                                | Novel                                     |
| c.3122C>G                              | p.Ser1041*                          | 11          | Nonsense               | China                                 | Chinese                         | 1                       |                                         | none                                | [20]                                      |
| c.3169_3172delAGTA                     | p.Ser1057fs                         | 11          | Deletion - frameshift  | Pakistan                              | Balouchi                        | 1                       |                                         | none                                | [34]                                      |
| c.3181delA                             | p.Ile1061*                          | 11          | Deletion - frameshift  | Thailand                              | Thai                            | 2                       | Asian                                   | 2                                   | [28]                                      |
| c.3214delC                             | p.Leu1072*                          | 11          | Deletion - frameshift  | Hong Kong<br>Singapore                | Chinese<br>Chinese              | 1<br>1                  | Asian                                   | 2                                   | [24]                                      |
| c.3228_3229delAG                       | p.Gly1077Alafs*8                    | 11          | Deletion - frameshift  | Korea                                 | Korean                          | 1                       |                                         | 27                                  | [11]                                      |
| c.3258delA                             | p.Val1088Phefs*21                   | 11          | Deletion - frameshift  | Korea                                 | Korean                          | 1                       |                                         | none                                | Novel                                     |
| c.3262delG                             | p.Val1088Phefs*21                   | 11          | Deletion - frameshift  | Singapore                             | Chinese                         | 1                       |                                         | none                                | [35]                                      |
| c.3266T>A                              | p.Leu1089*                          | 11          | Nonsense               | Korea                                 | Korean                          | 1                       |                                         | none                                | Novel                                     |
| c.3286C>T                              | p.Gln1096*                          | 11          | Nonsense               | Hong Kong<br>Pakistan                 | Chinese<br>Mohajir              | 1<br>1                  | Asian                                   | 1                                   | [7]                                       |
| c.3288_3289delAA                       | p.Leu1098Serfs*4                    | 11          | Deletion - frameshift  | Canada                                | Chinese                         | 1                       |                                         | 6                                   |                                           |
| c.3296delC                             | p.Pro1099Leufs*10                   | 11          | Deletion - frameshift  | Korea                                 | Korean                          | 5                       |                                         | 2                                   | [11]                                      |
| c.3330_3331insA                        | p.Gln1111Alafs*4                    | 11          | Insertion - frameshift | China                                 | Chinese                         | 1                       |                                         | 1                                   | [20]                                      |
| c.3331_3334delCAAG                     | p.Gln1111Asnfs*5                    | 11          | Deletion - frameshift  | India                                 | Indian                          | 1                       |                                         | 40                                  | [13]                                      |
| c.3333delA                             | p.Glu1112Asnfs*5                    | 11          | Deletion - frameshift  | Hong Kong<br>Malaysia<br>Mongolia     | Chinese<br>Chinese<br>Mongolian | 2<br>1<br>1             | Asian                                   | 1                                   | [47]                                      |
| c.3342_3345delAGAA                     | p.Glu1115*                          | 11          | Deletion - frameshift  | Hong Kong                             | Chinese                         | 2                       | Asian                                   | 2                                   | [24]                                      |
| c.3359_3363delTTAAT                    | p.Val1120Aspfs*11                   | 11          | Deletion - frameshift  | China                                 | Chinese                         | 2                       |                                         | none                                | [20, 32]                                  |
|                                        | p.Tyr1127*                          | 11          | Nonsense               | Singapore                             | Chinese                         | 1                       |                                         | n/a                                 |                                           |
| c.3424delG                             | p.Ala1142Hisfs*13                   | 11          | Deletion - frameshift  | Singapore                             | Chinese                         | 1                       |                                         | none                                | Novel                                     |
| c.3442delG                             | p.Glu1148Argfs*7                    | 11          | Deletion - frameshift  | Japan<br>Los Angeles<br>Stanford (US) | Japanese<br>Korean<br>Chinese   | 2<br>2<br>1             | Asian                                   | 2                                   | [23]                                      |
| c.3450delT                             | p.Asp1151Metfs*4                    | 11          | Deletion - frameshift  | China                                 | Chinese                         | 1                       |                                         | none                                | [32]                                      |
| c.3477_3480delAAAAG                    | p.Ile1159Metfs*50                   | 11          | Deletion - frameshift  | India<br>Los Angeles (US)             | Indian<br>Japanese/English      | 1<br>1                  |                                         | 3                                   | [14]                                      |
| c.3553G>T                              | p.Glu1185*                          | 11          | Nonsense               | India                                 | Indian                          | 1                       |                                         | none                                | [15]                                      |

| <b>BRCA1 mutation<br/>(nucleotide)</b> | <b>BRCA1 mutation<br/>(protein)</b> | <b>Exon</b> | <b>Mutation type</b>   | <b>Location</b>  | <b>Ethnicity</b> | <b>No. of<br/>cases</b> | <b>Asian-<br/>specific <sup>a</sup></b> | <b>BIC<br/>entries <sup>b</sup></b> | <b>References/<br/>Novel <sup>c</sup></b> |
|----------------------------------------|-------------------------------------|-------------|------------------------|------------------|------------------|-------------------------|-----------------------------------------|-------------------------------------|-------------------------------------------|
| c.3580_3581ins4                        |                                     | 11          | Insertion - frameshift | Japan            | Japanese         | 1                       |                                         | none                                | Novel                                     |
| c.3607C>T                              | p.Arg1203*                          | 11          | Nonsense               | Turkey           | Turkish          | 1                       |                                         | 35                                  | [45]                                      |
|                                        |                                     |             |                        | Hong Kong        | Chinese          | 1                       |                                         |                                     |                                           |
| c.3627dupA                             | p.Glu1210Argfs*9                    | 11          | Insertion - frameshift | Korea            | Korean           | 1                       |                                         | 7                                   | [25]                                      |
| c.3640G>T                              | p.Glu1214*                          | 11          | Nonsense               | Japan            | Japanese         | 2                       |                                         | 4                                   | [21]                                      |
| c.3661G>T                              | p.Glu1221*                          | 11          | Nonsense               | Malaysia         | Chinese          | 1                       |                                         | 8                                   |                                           |
|                                        |                                     |             |                        | China            | Chinese          | 1                       |                                         |                                     |                                           |
| c.3693dupT                             | p.Gly1232Trpfs*2                    | 11          | Insertion - frameshift | Pakistan         | Punjabi          | 1                       |                                         | none                                | [8]                                       |
| c.3700_3704delGTAAA                    | p.Val1234Glnfs*9                    | 11          | Deletion - frameshift  | Turkey           | Turkish          | 1                       |                                         | 61                                  | [10]                                      |
| c.3748G>T                              | p.Glu1250*                          | 11          | Nonsense               | Thailand         | Thai             | 2                       |                                         | 98                                  | [34]                                      |
|                                        |                                     |             |                        | India            | Indian           | 1                       |                                         |                                     | [48]                                      |
| c.3756_3759delGTCT                     | p.Ser1253Argfs*10                   | 11          | Deletion - frameshift  | Hong Kong        | Chinese          | 1                       |                                         | 124                                 |                                           |
| c.3767_3768delCA                       | p.Thr1256Argfs*10                   | 11          | Deletion - frameshift  | Hong Kong        | Chinese          | 1                       |                                         | none                                | Novel                                     |
| c.3770_3771delAG                       | p.Glu1257Glyfs*9                    | 11          | Deletion - frameshift  | China            | Chinese          | 1                       |                                         | 22                                  | [32]                                      |
|                                        |                                     |             |                        | Malaysia         | Chinese          | 1                       |                                         |                                     | [5]                                       |
|                                        |                                     |             |                        | Pakistan         | Punjabi          | 2                       |                                         |                                     | [7]                                       |
|                                        |                                     |             |                        | Los Angeles (US) | Chinese          | 1                       |                                         |                                     |                                           |
|                                        |                                     |             |                        | Stanford (US)    | Chinese          | 1                       |                                         |                                     |                                           |
| c.3813dupT                             | p.Asn1272*                          | 11          | Insertion - frameshift | Korea            | Korean           | 4                       |                                         | none                                | [11]                                      |
| c.3856delA                             | p.Ser1286Valfs*21                   | 11          | Deletion - frameshift  | Malaysia         | Malay            | 1                       | Asian                                   | 2                                   |                                           |
| c.3858_3861delTGAG                     | p.Ser1286Argfs*20                   | 11          | Deletion - frameshift  | Hong Kong        | Chinese          | 1                       |                                         | 2                                   | [24]                                      |
|                                        |                                     |             |                        | Singapore        | Chinese          | 2                       |                                         |                                     | [12]                                      |
|                                        |                                     |             |                        | Stanford (US)    | Chinese          | 1                       |                                         |                                     |                                           |
| c.3869_3870delAA                       | p.Lys1290Metfs*4                    | 11          | Deletion - frameshift  | Hong Kong        | Chinese          | 1                       |                                         | 6                                   |                                           |
| c.3893C>A                              | p.Ser1298*                          | 11          | Nonsense               | Malaysia         | Chinese          | 1                       |                                         | 6                                   |                                           |
| c.3916_3917delTT                       | p.Leu1306Aspfs*23                   | 11          | Deletion - frameshift  | China            | Chinese          | 2                       |                                         | 11                                  | [32]                                      |
| c.3991C>T                              | p.Gln1331*                          | 11          | Nonsense               | Korea            | Korean           | 3                       |                                         | none                                | [11]                                      |
| c.4041_4042delAG                       | p.Gly1348Asnfs*7                    | 11          | Deletion - frameshift  | Israel           | Druze            | 1                       |                                         | 7                                   | [22]                                      |
| c.4049dupG                             | p.Glu1352Glyfs*4                    | 11          | Insertion - frameshift | Hong Kong        | Chinese          | 1                       |                                         | none                                | [24]                                      |
| c.4065_4068delTCAA                     | p.Asn1355Lysfs*10                   | 11          | Deletion - frameshift  | Hong Kong        | Chinese          | 2                       |                                         | 133                                 | [24]                                      |
|                                        |                                     |             |                        | Korea            | Korean           | 1                       |                                         |                                     | [11]                                      |
|                                        |                                     |             |                        | India            | Indian           | 1                       |                                         |                                     | [14]                                      |



| <b>BRCA1 mutation<br/>(nucleotide)</b> | <b>BRCA1 mutation<br/>(protein)</b> | <b>Exon</b> | <b>Mutation type</b>   | <b>Location</b>  | <b>Ethnicity</b>   | <b>No. of<br/>cases</b> | <b>Asian-<br/>specific <sup>a</sup></b> | <b>BIC<br/>entries <sup>b</sup></b> | <b>References/<br/>Novel <sup>c</sup></b> |
|----------------------------------------|-------------------------------------|-------------|------------------------|------------------|--------------------|-------------------------|-----------------------------------------|-------------------------------------|-------------------------------------------|
|                                        |                                     |             |                        | Pakistan         | Punjabi, Sindhi    | 4                       |                                         |                                     | [7]                                       |
|                                        |                                     |             |                        | Stanford (US)    | Chinese            | 1                       |                                         |                                     |                                           |
| c.4092_4093delCT                       | p.Leu1365Argfs*2                    | 11          | Deletion - frameshift  | Korea            | Korean             | 1                       |                                         | none                                | [11]                                      |
| c.4094delT                             | p.Leu1365*                          | 11          | Deletion - frameshift  | India            | Indian             | 1                       |                                         | none                                | [13]                                      |
| c.4117G>T                              | p.Glu1373*                          | 12          | Nonsense               | Israel           | Palestinian Arab   | 1                       |                                         | 9                                   | [49]                                      |
| c.4148C>G                              | p.Ser1383*                          | 12          | Nonsense               | Hong Kong        | Chinese            | 1                       | Asian                                   | 2                                   |                                           |
|                                        |                                     |             |                        | Malaysia         | Chinese            | 3                       |                                         |                                     |                                           |
| c.4158_4162delCTCTC                    | p.Ser1387Glu fs*2                   | 12          | Deletion - frameshift  | India            | Indian             | 1                       |                                         | none                                | [50]                                      |
| c.4165_4166delAG                       | p.Ser1389*                          | 12          | Deletion - frameshift  | Pakistan         | Muhajir            | 2                       |                                         | 11                                  | [7]                                       |
| c.4183C>T                              | p.Gln1395*                          | 12          | Nonsense               | India            | Indian             | 1                       |                                         | 28                                  | [16]                                      |
|                                        |                                     |             |                        | Pakistan         | Punjabi            | 1                       |                                         |                                     | [8]                                       |
| Deletion of exon 13 to exon 15         |                                     | 13 to 15    | Large deletion         | Korea            | Korean             | 1                       |                                         | n/a                                 | [11]                                      |
|                                        |                                     |             |                        | Malaysia         | Indian             | 1                       |                                         |                                     | [4]                                       |
|                                        |                                     |             |                        | Singapore        | Indian             | 1                       |                                         |                                     | [51]                                      |
|                                        |                                     |             |                        | Indonesia        | Indonesian         | 1                       |                                         |                                     | [52]                                      |
|                                        |                                     |             |                        | Los Angeles (US) | Korean             | 1                       |                                         |                                     |                                           |
| Duplication of exon 13                 |                                     | 13          | Large duplication      | Singapore        | Chinese            | 2                       |                                         | n/a                                 | [12, 51]                                  |
| c.4253T>G                              | p.Leu1418*                          | 13          | Nonsense               | Iran             | Iranian            | 1                       |                                         | none                                | [38]                                      |
| c.4258C>T                              | p.Gln1420*                          | 13          | Nonsense               | Malaysia         | Chinese            | 1                       | Asian                                   | 2                                   | [5]                                       |
| c.4327C>T                              | p.Arg1443*                          | 13          | Nonsense               | Malaysia         | Indian             | 2                       |                                         | 126                                 |                                           |
|                                        |                                     |             |                        | Singapore        | Chinese            | 1                       |                                         |                                     | [35]                                      |
|                                        |                                     |             |                        | India            | Indian             | 1                       |                                         |                                     | [50]                                      |
| c.4335_4338dupAGAA                     | p.Gln1447Argfs*16                   | 13          | Insertion - frameshift | Korea            | Korean             | 2                       |                                         | none                                | [11]                                      |
| c.4338_4339ins4                        | Stop 1462                           | 13          | Insertion - frameshift | Stanford (US)    | Korean             | 1                       |                                         | 1                                   |                                           |
| c.4372C>T                              | p.Gln1458*                          | 14          | Nonsense               | Hong Kong        | Chinese            | 4                       |                                         | 3                                   | [24]                                      |
| c.4389delC                             |                                     | 14          | Deletion - frameshift  | Turkey           | Turkish            | 1                       |                                         | none                                | [10]                                      |
| c.4484+1delG                           |                                     | IVS14       | Intervening sequence   | Turkey           | Turkish            | 1                       |                                         | none                                | [10]                                      |
| c.4485-1G>A                            |                                     | IVS14       | Intervening sequence   | Pakistan         | Pashtun, Punjabi   | 3                       | Asian                                   | 2                                   | [7]                                       |
| c.4485-2A>G                            |                                     | IVS14       | Intervening sequence   | Japan            | Japanese           | 1                       |                                         | 7                                   | [21]                                      |
| c.4508C>A                              | p.Ser1503*                          | 15          | Nonsense               | Pakistan         | Pakistani, Punjabi | 6                       |                                         | 1                                   | [7, 8]                                    |
| c.4524G>A                              | p.Trp1508*                          | 15          | Nonsense               | Korea            | Korean             | 1                       |                                         | 23                                  |                                           |
|                                        |                                     |             |                        | Israel           | Moslem             | 1                       |                                         |                                     | [22]                                      |

| <b>BRCA1 mutation<br/>(nucleotide)</b>               | <b>BRCA1 mutation<br/>(protein)</b> | <b>Exon</b> | <b>Mutation type</b>   | <b>Location</b>  | <b>Ethnicity</b>  | <b>No. of<br/>cases</b> | <b>Asian-<br/>specific <sup>a</sup></b> | <b>BIC<br/>entries <sup>b</sup></b> | <b>References/<br/>Novel <sup>c</sup></b> |
|------------------------------------------------------|-------------------------------------|-------------|------------------------|------------------|-------------------|-------------------------|-----------------------------------------|-------------------------------------|-------------------------------------------|
|                                                      | p.Gln1538*                          | 15          | Nonsense               | Philippines      | Filipino          | 1                       |                                         | n/a                                 | [53]                                      |
|                                                      | p.Glu1540*                          | 15          | Nonsense               | Stanford (US)    | Fijian            | 1                       |                                         | n/a                                 |                                           |
| c.4656C>G                                            | p.Tyr1552*                          | 15          | Nonsense               | Hong Kong        | Chinese           | 1                       |                                         | 2                                   | [24]                                      |
|                                                      | p.Glu1559*                          | 15          | Nonsense               | Stanford (US)    | Chinese           | 1                       |                                         | n/a                                 |                                           |
| c.4675+1G>T                                          |                                     | IVS15       | Intervening sequence   | Stanford (US)    | Chinese           | 1                       |                                         | none                                | Novel                                     |
| c.4695dupA                                           | p.Ser1566Ilefs*8                    | 16          | Insertion - frameshift | Hong Kong        | Chinese           | 1                       |                                         | none                                | [24]                                      |
| c.4780_4793del14                                     | p.Pro1594Cysfs*23                   | 16          | Deletion - frameshift  | Hong Kong        | Chinese           | 1                       |                                         | none                                | Novel                                     |
| c.4801A>T                                            | p.Lys1601*                          | 16          | Nonsense               | Singapore        | Chinese           | 1                       | Asian                                   | 2                                   | [12]                                      |
|                                                      |                                     |             |                        | Los Angeles (US) | Chinese           | 1                       |                                         |                                     |                                           |
| c.4838dupG                                           | p.Ser1613Argfs*9                    | 16          | Insertion - frameshift | India            | Indian            | 1                       |                                         | none                                | [16]                                      |
| c.4903G>T                                            | p.Glu1635*                          | 16          | Nonsense               | Hong Kong        | Chinese           | 1                       |                                         | none                                | [24]                                      |
| c.4910delC                                           | p.Pro1637Glnfs*3                    | 16          | Deletion - frameshift  | China            | Chinese           | 1                       |                                         | none                                | [36]                                      |
|                                                      | p.Ser1655Phe                        | 16          | Missense               | Japan            | Japanese          | 1                       |                                         | n/a                                 |                                           |
| c.4981G>T                                            | p.Glu1661*                          | 16          | Nonsense               | Korea            | Korean            | 1                       |                                         | 1                                   | [11]                                      |
| c.4986+1G>A                                          |                                     | IVS16       | Intervening sequence   | China            | Uyghur            | 1                       |                                         | 1                                   | [39]                                      |
| Deletion of exon 17 to exon 19                       |                                     | 17 to 19    | Large deletion         | Turkey           | Turkish           | 1                       |                                         | none                                | [2]                                       |
| r.4987_5277del291,<br>Deletion of exon 17 to exon 20 | p.Met1663_Lys1759<br>del97          | 17 to 20    | Large deletion         | Hong Kong        | Chinese           | 1                       | Asian                                   | 1                                   | [24]                                      |
| c.5030_5033delCTAA                                   | p.Thr1677Ilefs*2                    | 17          | Deletion - frameshift  | Korea            | Korean            | 6                       |                                         | 17                                  | [54]                                      |
|                                                      |                                     |             |                        | Pakistan         | Punjabi           | 1                       |                                         |                                     | [8]                                       |
|                                                      |                                     |             |                        | Taiwan           | Chinese           | 1                       |                                         |                                     | [55]                                      |
| c.5059delG                                           | p.Val1687Leufs*3                    | 17          | Deletion - frameshift  | Stanford (US)    | Asian             | 3                       |                                         | none                                | Novel                                     |
| c.5065dupA                                           | p.Met1689Asnfs*6                    | 17          | Insertion - frameshift | Korea            | Korean            | 2                       |                                         | none                                | Novel                                     |
| c.5074+1G>A                                          |                                     | IVS17       | Intervening sequence   | Malaysia         | Indian            | 1                       | Asian                                   | 1                                   |                                           |
| c.5074+1G>T                                          |                                     | IVS17       | Intervening sequence   | Korea            | Korean            | 1                       |                                         | 3                                   | [11]                                      |
| c.5074+3A>G                                          |                                     | IVS17       | Intervening sequence   | Japan            | Japanese          | 1                       |                                         | 1                                   |                                           |
| c.5075-1G>T                                          |                                     | IVS17       | Intervening sequence   | China            | Chinese           | 1                       |                                         | none                                | [20]                                      |
| c.5075-2A>T                                          |                                     | IVS17       | Intervening sequence   | Sri Lanka        | Sri Lankan        | 1                       |                                         | 1                                   | [29]                                      |
| Deletion of exon 18                                  |                                     | 18          | Large deletion         | Turkey           | Turkish           | 3                       |                                         | none                                | [2]                                       |
| Deletion of exon 18 to exon 19                       |                                     | 18 to 19    | Large deletion         | Turkey           | Turkish           | 1                       |                                         | none                                | [2]                                       |
| c.5080G>T                                            | p.Glu1694*                          | 18          | Nonsense               | Korea            | Korean            | 6                       |                                         | 12                                  | [56]                                      |
| c.5123C>A                                            | p.Ala1708Glu                        | 18          | Missense               | Israel           | Non-Ashkenazi Jew | 1                       |                                         | 46                                  | [22]                                      |

| <b>BRCA1 mutation<br/>(nucleotide)</b>     | <b>BRCA1 mutation<br/>(protein)</b> | <b>Exon</b> | <b>Mutation type</b>   | <b>Location</b>  | <b>Ethnicity</b>               | <b>No. of<br/>cases</b> | <b>Asian-<br/>specific <sup>a</sup></b> | <b>BIC<br/>entries <sup>b</sup></b> | <b>References/<br/>Novel <sup>c</sup></b> |
|--------------------------------------------|-------------------------------------|-------------|------------------------|------------------|--------------------------------|-------------------------|-----------------------------------------|-------------------------------------|-------------------------------------------|
| c.5148T>G                                  | p.Tyr1716*                          | 18          | Nonsense               | India            | Indian                         | 1                       |                                         | none                                | [13]                                      |
| c.5152+1G>C                                |                                     | IVS18       | Intervening sequence   | Korea            | Korean                         | 3                       |                                         | 2                                   | [11]                                      |
| c.5153-1G>A                                |                                     | IVS18       | Intervening sequence   | Malaysia         | Malay                          | 1                       |                                         | 5                                   |                                           |
| c.5153-2delA                               |                                     | IVS18       | Intervening sequence   | Korea            | Korean                         | 1                       |                                         | 8                                   |                                           |
| c.5161C>T                                  | p.Gln1721*                          | 19          | Nonsense               | Israel           | Moslem                         | 1                       |                                         | none                                | [22]                                      |
|                                            | p.Gln1721*                          | 19          | Nonsense               | Japan            | Japanese                       | 1                       |                                         | n/a                                 |                                           |
| c.5184delG                                 | p.Met1728Ilefs*2                    | 19          | Deletion - frameshift  | Korea            | Korean                         | 1                       |                                         | none                                | Novel                                     |
| c.5193+1G>C                                | p.Trp1718Serfs*2                    | IVS19       | Intervening sequence   | Hong Kong        | Chinese                        | 1                       |                                         | none                                | [24]                                      |
| c.5193+2insT                               |                                     | IVS19       | Intervening sequence   | Japan            | Japanese                       | 1                       |                                         | none                                | Novel                                     |
| c.5194-1G>A                                |                                     | IVS19       | Intervening sequence   | Stanford (US)    | Chinese                        | 1                       |                                         | 1                                   |                                           |
| c.5194-?_5277+?del,<br>Deletion of exon 20 |                                     | 20          | Large deletion         | Japan            | Japanese                       | 1                       |                                         | 1                                   |                                           |
| Duplication of exon 20 to exon 24          |                                     | 20 to 24    | Large duplication      | Bangladesh       | Bangladeshi                    | 1                       |                                         | n/a                                 |                                           |
| c.5251C>T                                  | p.Arg1751*                          | 20          | Nonsense               | Malaysia         | Indian                         | 1                       |                                         | 34                                  | [5]                                       |
|                                            |                                     |             |                        | Singapore        | Malay                          | 1                       |                                         |                                     |                                           |
|                                            |                                     |             |                        | Los Angeles (US) | Vietnamese                     | 1                       |                                         |                                     |                                           |
|                                            |                                     |             |                        | Stanford (US)    | Asian, Filipino,<br>Vietnamese | 5                       |                                         |                                     |                                           |
| c.5257dupA                                 | p.Arg1753Lysfs*77                   | 20          | Insertion - frameshift | Pakistan         | Punjabi                        | 1                       |                                         | none                                | [8]                                       |
| c.5260G>T                                  | p.Glu1754*                          | 20          | Nonsense               | Korea            | Korean                         | 1                       |                                         | 4                                   |                                           |
|                                            |                                     |             |                        | India            | Indian                         | 3                       |                                         |                                     | [48]                                      |
| c.5266dupC                                 | p.Ser1755?fs                        | 20          | Insertion - frameshift | Turkey           | Turkish                        | 6                       |                                         | 1093                                | [2, 10, 57]                               |
| c.5266C>T                                  | p.Gln1756*                          | 20          | Nonsense               | Korea            | Korean                         | 1                       |                                         | none                                | [54]                                      |
| c.5278-1G>A                                |                                     | IVS20       | Intervening sequence   | Japan            | Japanese                       | 1                       |                                         | 3                                   |                                           |
| c.5278-1G>C                                |                                     | IVS20       | Intervening sequence   | Japan            | Japanese                       | 1                       |                                         | none                                |                                           |
|                                            |                                     |             |                        | Pakistan         | Punjabi                        | 1                       |                                         |                                     | [8]                                       |
| Deletion of exon 21 to exon 22             |                                     | 21 to 22    | Large deletion         | Malaysia         | Malay                          | 3                       |                                         | n/a                                 |                                           |
| Deletion of exon 21                        |                                     | 21          | Large deletion         | Los Angeles (US) | Pakistani                      | 1                       |                                         | n/a                                 |                                           |
| c.5289delG                                 | p.Leu1764*                          | 21          | Deletion - frameshift  | Sri Lanka        | Sri Lankan                     | 1                       |                                         | none                                | [29]                                      |
| c.5299delT                                 | p.Cys1767Valfs*26                   | 21          | Deletion - frameshift  | Malaysia         | Indian                         | 1                       |                                         | none                                | Novel                                     |
| c.5300_5301delGT                           | p.Cys1767Leufs*62                   | 21          | Deletion - frameshift  | Korea            | Korean                         | 1                       |                                         | none                                | Novel                                     |
| c.5310dupG                                 | p.Gly1770fs                         | 21          | Insertion - frameshift | Pakistan         | Balouchi                       | 1                       |                                         | none                                | [34]                                      |

| <b>BRCA1 mutation<br/>(nucleotide)</b> | <b>BRCA1 mutation<br/>(protein)</b> | <b>Exon</b> | <b>Mutation type</b>   | <b>Location</b> | <b>Ethnicity</b> | <b>No. of<br/>cases</b> | <b>Asian-<br/>specific <sup>a</sup></b> | <b>BIC<br/>entries <sup>b</sup></b> | <b>References/<br/>Novel <sup>c</sup></b> |
|----------------------------------------|-------------------------------------|-------------|------------------------|-----------------|------------------|-------------------------|-----------------------------------------|-------------------------------------|-------------------------------------------|
| c.5328dupC                             | p.Thr1777Hisfs*53                   | 21          | Insertion - frameshift | Malaysia        | Malay            | 2                       |                                         | 2                                   |                                           |
| c.5332+1delG                           |                                     | IVS21       | Intervening sequence   | China           | Chinese          | 1                       |                                         | none                                | [32]                                      |
| c.5332+1G>C                            |                                     | IVS21       | Intervening sequence   | China           | Chinese          | 1                       |                                         | none                                | [20]                                      |
| c.5335delC                             | p.Gln1779Asnfs*14                   | 22          | Deletion - frameshift  | Philippines     | Filipino         | 1                       | Asian                                   | 5                                   | [53]                                      |
|                                        |                                     |             |                        | Taiwan          | Chinese          | 1                       |                                         |                                     | [55]                                      |
|                                        |                                     |             |                        | Stanford (US)   | Filipino         | 1                       |                                         |                                     |                                           |
| c.5353C>T                              | p.Gln1785*                          | 22          | Nonsense               | Hong Kong       | Chinese          | 1                       |                                         | 4                                   |                                           |
| c.5363G>T                              | p.Gly1788Val                        | 22          | Missense               | China           | Chinese          | 1                       |                                         | 17                                  | [32]                                      |
| c.5406+1_5406+3delGTA                  | p.Asp1778Glyfs*27                   | IVS22       | Intervening sequence   | Hong Kong       | Chinese          | 3                       |                                         | none                                | [24]                                      |
| c.5406+7A>G                            | p.Asp1778Glyfs*27                   | IVS22       | Intervening sequence   | Hong Kong       | Chinese          | 2                       |                                         | none                                | Novel                                     |
| c.5406+33A>T                           |                                     | IVS22       | Intervening sequence   | Korea           | Korean           | 1                       |                                         | 2                                   |                                           |
|                                        |                                     |             |                        | Stanford (US)   | Filipino         | 1                       |                                         |                                     |                                           |
| c.5444G>A                              | p.Trp1815*                          | 23          | Nonsense               | Korea           | Korean           | 10                      |                                         | 4                                   | [11]                                      |
|                                        |                                     |             |                        | Lebanon         | Lebanese         | 2                       |                                         |                                     | [19]                                      |
| c.5467+1G>A                            |                                     | IVS23       | Intervening sequence   | Korea           | Korean           | 6                       |                                         | 5                                   |                                           |
| c.5468-1_5474delGCAATTGG               |                                     | IVS23       | Intervening sequence   | China           | Chinese          | 1                       |                                         | none                                | [32]                                      |
|                                        |                                     |             |                        | Korea           | Korean           | 1                       |                                         |                                     |                                           |
| Deletion of exon 24                    |                                     | 24          | Large deletion         | Bangladesh      | Bangladeshi      | 1                       |                                         | n/a                                 |                                           |
| c.5470_5477delATTGGGCA                 | p.Ile1824Aspfs*3                    | 24          | Deletion - frameshift  | China           | Chinese          | 4                       | Asian                                   | 2                                   | [20]                                      |
|                                        |                                     |             |                        | Korea           | Korean           | 7                       |                                         |                                     | [11]                                      |
| c.5483delG                             | p.Cys1828Leufs*6                    | 24          | Deletion - frameshift  | Korea           | Korean           | 2                       |                                         | none                                | [11]                                      |
| c.5496_5506<br>delGGTGACCCGAGinsA      | Stop 1842                           | 24          | Frameshift             | Korea           | Korean           | 20                      | Asian                                   | 3                                   | [25]                                      |
|                                        |                                     |             |                        | Stanford (US)   | Korean           | 1                       |                                         |                                     |                                           |
| c.5503C>T                              | p.Arg1835*                          | 24          | Nonsense               | Pakistan        | Punjabi          | 2                       |                                         | 74                                  | [8]                                       |
|                                        |                                     |             |                        | Japan           | Japanese         | 1                       |                                         |                                     |                                           |
|                                        |                                     |             |                        | Turkey          | Turkish          | 1                       |                                         |                                     | [57]                                      |
|                                        |                                     |             |                        | Philippines     | Filipino         | 1                       |                                         |                                     | [53]                                      |
|                                        |                                     |             |                        | Hong Kong       | Chinese          | 1                       |                                         |                                     |                                           |
| c.5521delA                             | p.Ser1841Valfs*2                    | 24          | Deletion - frameshift  | China           | Chinese          | 2                       |                                         | 1                                   | [20, 32]                                  |
| c.5536C>T                              | p.Gln1846*                          | 24          | Nonsense               | Taiwan          | Chinese          | 1                       |                                         | 2                                   | [55]                                      |

*BRCA1* reference sequence (GenBank accession no.: U14680.1). Numbering of the nucleotides begins at the transcription start site ATG. Mutations for nucleotide

and protein sequences are designated according to the HGVS nomenclature guidelines.

<sup>a</sup> Asian-specific mutations; *BRCA1* mutations that have been reported only in the Asian ethnicities in Breast Cancer Information Core (BIC) Database.

<sup>b</sup> none: Mutations that have not been listed in BIC Database. n/a: Information on large genome re-arrangements are not available in the BIC Database.; or the nucleotide change data was missing and thus cannot be matched to the BIC Database.

<sup>c</sup> Novel mutations that have not been previously reported in literature nor listed in the BIC Database.

**Supp. Table S2. List of *BRCA2* pathogenic mutations found in Asian populations.**

| <i>BRCA2</i> mutation (nucleotide) | <i>BRCA2</i> mutation (protein) | Exon           | Mutation type          | Location      | Ethnicity  | No. of cases | Asian-specific <sup>a</sup> | BIC entries <sup>b</sup> | References/Novel <sup>c</sup> |
|------------------------------------|---------------------------------|----------------|------------------------|---------------|------------|--------------|-----------------------------|--------------------------|-------------------------------|
| c.-39-1_-39delGA                   | p.0?                            | IVS1 to Exon 2 | Intervening sequence   | Hong Kong     | Chinese    | 1            |                             | none                     | Novel                         |
| c.97G>T                            | p.Glu33*                        | 3              | Nonsense               | Korea         | Korean     | 4            |                             | none                     | [11]                          |
| g.8730_24909dup16180               |                                 |                | Large duplication      | Singapore     | Chinese    | 1            |                             | n/a                      | [51]                          |
| c.262_263delCT                     | p.Leu88Alafs*12                 | 3              | Deletion - frameshift  | Malaysia      | Malay      | 5            |                             | 4                        | [5]                           |
|                                    |                                 |                |                        | China         | Chinese    | 1            |                             |                          | [32]                          |
| c.276dupA                          | p.Ser93Ilefs*8                  | 3              | Insertion - frameshift | Korea         | Korean     | 1            | Asian                       | 1                        | [11]                          |
| c.289G>T                           | p.Glu97*                        | 3              | Nonsense               | Korea         | Korean     | 1            |                             | none                     | Novel                         |
| c.370delA                          | p.Met124Trpfs*12                | 4              | Deletion - frameshift  | Korea         | Korean     | 3            |                             | none                     | [11]                          |
| c.464_468delGAGAT                  | p.Arg155Lysfs*26                | 5              | Deletion - frameshift  | China         | Chinese    | 1            |                             | none                     | [20]                          |
| c.466_467delGA                     | p.Asp156*                       | 5              | Deletion - frameshift  | Korea         | Korean     | 2            |                             | none                     | Novel                         |
| c.470_474delAGTCA                  | p.Lys157Serfs*24                | 5              | Deletion - frameshift  | Stanford (US) | Chinese    | 1            |                             | 1                        |                               |
|                                    |                                 |                |                        | China         | Chinese    | 1            |                             |                          | [20]                          |
| c.475G>A                           | p.Val159Met                     | 5              | Missense               | Korea         | Korean     | 2            |                             | 2                        | [11]                          |
| c.475+1G>A                         |                                 | IVS5           | Intervening sequence   | Japan         | Japanese   | 1            |                             | 2                        |                               |
| c.584C>G                           | p.Ser195*                       | 7              | Nonsense               | Korea         | Korean     | 1            |                             | none                     | Novel                         |
| c.613_614delAG                     | p.Ser205Phefs*9                 | 7              | Deletion - frameshift  | Stanford (US) | Chinese    | 1            |                             | none                     | Novel                         |
| c.658_659delGT                     | p.Val220Ilefs*4                 | 8              | Deletion - frameshift  | Korea         | Korean     | 2            |                             | 38                       | [11]                          |
| c.682-1G>C                         |                                 | IVS8           | Intervening sequence   | Sri Lanka     | Sri Lankan | 1            |                             | 1                        | [58]                          |
| c.755delA                          | p.Asp252Alafs*25                | 9              | Deletion - frameshift  | Stanford (US) | Chinese    | 1            |                             | 1                        |                               |
| c.771_775delTCAAA                  | p.Asn257Lysfs*17                | 9              | Deletion - frameshift  | Korea         | Korean     | 7            |                             | 14                       | [25]                          |
| c.774_775delAA                     | p.Glu260Serfs*15                | 9              | Deletion - frameshift  | Malaysia      | Chinese    | 1            |                             | none                     | Novel                         |
|                                    |                                 |                |                        | Singapore     | Chinese    | 1            |                             |                          |                               |
| c.809C>G                           | p.Ser270*                       | 10             | Nonsense               | Malaysia      | Chinese    | 1            | Asian                       | 1                        |                               |
| c.905_906insA                      | p.Ser303Leufs*2                 | 10             | Insertion - frameshift | Canada        | Chinese    | 1            |                             | none                     | Novel                         |
| c.910G>T                           | p.Glu304*                       | 10             | Nonsense               | Singapore     | Chinese    | 1            |                             | none                     | Novel                         |
|                                    | p.Cys315Ser                     | 10             | Missense               | Stanford (US) | Chinese    | 1            |                             | n/a                      |                               |
| c.956dupA                          | p.Asn319Lysfs*8                 | 10             | Insertion - frameshift | Malaysia      | Chinese    | 1            |                             | 4                        | [5]                           |
| c.994_995insAA                     | p.Ile332Lysfs*18                | 10             | Insertion - frameshift | China         | Chinese    | 1            |                             | none                     | [32]                          |
| c.994delA                          | p.Ile332Phefs*17                | 10             | Deletion - frameshift  | Korea         | Korean     | 1            |                             | 3                        | [11]                          |
| c.1082delA                         | p.Asn361Metfs*6                 | 10             | Deletion - frameshift  | China         | Chinese    | 1            |                             | none                     | [20]                          |

| <b>BRCA2 mutation (nucleotide)</b> | <b>BRCA2 mutation (protein)</b> | <b>Exon</b> | <b>Mutation type</b>   | <b>Location</b>  | <b>Ethnicity</b> | <b>No. of cases</b> | <b>Asian-specific <sup>a</sup></b> | <b>BIC entries <sup>b</sup></b> | <b>References/ Novel <sup>c</sup></b> |
|------------------------------------|---------------------------------|-------------|------------------------|------------------|------------------|---------------------|------------------------------------|---------------------------------|---------------------------------------|
| c.1261C>T                          | p.Gln421*                       | 10          | Nonsense               | Hong Kong        | Chinese          | 1                   |                                    | 1                               | [24]                                  |
| c.1278delA                         | p.Asp427Thrfs*3                 | 10          | Deletion - frameshift  | Japan            | Japanese         | 1                   |                                    | 2                               | [27]                                  |
| c.1303dupA                         | p.Arg435Lysfs*17                | 10          | Insertion - frameshift | China            | Chinese          | 1                   |                                    | none                            | [20]                                  |
| c.1310_1313delAAGA                 | p.Lys437fs                      | 10          | Deletion - frameshift  | Korea            | Korean           | 1                   |                                    | 10                              | [11]                                  |
| c.1317delT                         | p.Thr441Leufs*19                | 10          | Deletion - frameshift  | Korea            | Korean           | 1                   |                                    | none                            | Novel                                 |
| c.1399A>T                          | p.Lys467*                       | 10          | Nonsense               | Los Angeles (US) | Korean           | 2                   | Asian                              | 2                               |                                       |
|                                    |                                 |             |                        | Korea            | Korean           | 26                  |                                    |                                 | [25]                                  |
|                                    |                                 |             |                        | China            | Chinese          | 1                   |                                    |                                 | [39]                                  |
| c.1514delT                         | p.Ile505Asnfs*4                 | 10          | Deletion - frameshift  | Korea            | Korean           | 3                   |                                    | none                            | [11]                                  |
| c.1583delA                         | p.Asn528Thrfs*30                | 10          | Deletion - frameshift  | Stanford (US)    | Japanese         | 2                   |                                    | none                            | Novel                                 |
| c.1763_1766delATAA                 | p.Asn588Serfs*25                | 10          | Deletion - frameshift  | Israel           | Moslem           | 2                   |                                    | 5                               | [22]                                  |
| c.1765_1766delAA                   | p.Lys589Valfs*7                 | 10          | Deletion - frameshift  | Pakistan         | Punjabi          | 1                   |                                    | none                            | [8]                                   |
| c.1773_1776delTTAT                 | p.Ile591Metfs*22                | 10          | Deletion - frameshift  | Los Angeles (US) | Thai             | 1                   |                                    | 3                               |                                       |
|                                    |                                 |             |                        | Stanford (US)    | Vietnamese       | 1                   |                                    |                                 |                                       |
|                                    |                                 |             |                        | Malaysia         | Chinese          | 1                   |                                    |                                 | [5]                                   |
| c.1813dupA                         | p.Ile605Asnfs*11                | 10          | Insertion - frameshift | Japan            | Japanese         | 1                   |                                    | 76                              | [23]                                  |
|                                    |                                 |             |                        | Malaysia         | Indian           | 1                   |                                    |                                 |                                       |
|                                    |                                 |             |                        | Korea            | Korean           | 2                   |                                    |                                 | [25]                                  |
| c.1813delA                         | p.Ile605Tyrfs*9                 | 10          | Deletion - frameshift  | China            | Chinese          | 1                   |                                    | 16                              | [20]                                  |
|                                    |                                 |             |                        | Thailand         | Thai             | 1                   |                                    |                                 | [28]                                  |
| c.1815dupA                         | p.Pro606Thrfs*10                | 10          | Insertion - frameshift | Philippines      | Filipino         | 1                   |                                    | 4                               | [53]                                  |
| c.1832C>A                          | p.Ser611*                       | 10          | Nonsense               | China            | Chinese          | 3                   |                                    | 14                              | [32]                                  |
| c.1855C>T                          | p.Gln619*                       | 10          | Nonsense               | Pakistan         | Punjabi          | 1                   |                                    | 2                               | [8]                                   |
| c.1881delA                         | p.Pro628Hisfs*16                | 10          | Deletion - frameshift  | China            | Chinese          | 1                   |                                    | none                            | [20]                                  |
| c.1901delC                         | p.Ala634Valfs*10                | 10          | Deletion - frameshift  | China            | Chinese          | 1                   |                                    | none                            | [20]                                  |
| c.2175_2176insA                    | p.Val726Serfs*25                | 11          | Insertion - frameshift | Sri Lanka        | Sri Lankan       | 4                   |                                    | none                            | [58]                                  |
| c.2254_2257delGACT                 | p.Asp752Phefs*19                | 11          | Deletion - frameshift  | Saudi Arabia     | Palestinian Arab | 1                   | Asian                              | 1                               | [59]                                  |
| c.2339C>G                          | p.Ser780*                       | 11          | Nonsense               | Hong Kong        | Chinese          | 1                   |                                    | none                            | Novel                                 |
| c.2435delA                         | p.Asn812Ilefs*13                | 11          | Deletion - frameshift  | Korea            | Korean           | 2                   |                                    | 1                               | [54]                                  |
| c.2439_2440insT                    | p.Pro814Serfs*13                | 11          | Insertion - frameshift | Sri Lanka        | Sri Lankan       | 1                   |                                    | none                            | [58]                                  |
| c.2442delC                         | p.Met815Trpfs*10                | 11          | Deletion - frameshift  | China            | Chinese          | 1                   |                                    | none                            | [20]                                  |
|                                    |                                 |             |                        | Taiwan           | Taiwanese        | 1                   |                                    |                                 | [60]                                  |

| <b>BRCA2 mutation<br/>(nucleotide)</b> | <b>BRCA2 mutation<br/>(protein)</b> | <b>Exon</b> | <b>Mutation type</b>   | <b>Location</b>  | <b>Ethnicity</b> | <b>No. of<br/>cases</b> | <b>Asian-<br/>specific <sup>a</sup></b> | <b>BIC<br/>entries <sup>b</sup></b> | <b>References/<br/>Novel <sup>c</sup></b> |
|----------------------------------------|-------------------------------------|-------------|------------------------|------------------|------------------|-------------------------|-----------------------------------------|-------------------------------------|-------------------------------------------|
|                                        |                                     |             |                        | Hong Kong        | Chinese          | 1                       |                                         |                                     |                                           |
| c.2446delG                             | p.Glu816Lysfs*9                     | 11          | Deletion - frameshift  | Pakistan         | Muhajir          | 1                       | Asian                                   | 1                                   | [7]                                       |
| c.2471_2476delTAAATG                   | p.Leu824*                           | 11          | Deletion - frameshift  | Malaysia         | Malay            | 1                       | Asian                                   | 1                                   | [5]                                       |
|                                        |                                     |             |                        | Indonesia        | Indonesian       | 2                       |                                         |                                     | [52]                                      |
| c.2588dupA                             | p.Asn863Lysfs*18                    | 11          | Insertion - frameshift | China            | Chinese          | 1                       |                                         | 11                                  | [20]                                      |
| c.2594_2597delAAGA                     | p.Glu866Leufs*7                     | 11          | Deletion - frameshift  | Singapore        | Chinese          | 1                       |                                         | none                                | [12]                                      |
| c.2595delA                             | p.Glu866Lysfs*8                     | 11          | Deletion - frameshift  | Hong Kong        | Chinese          | 2                       |                                         | none                                | [24]                                      |
| c.2612C>G                              | p.Ser871*                           | 11          | Nonsense               | Stanford (US)    | Vietnamese       | 1                       |                                         | none                                | Novel                                     |
| c.2636_2637delCT                       | p.Ser879*                           | 11          | Deletion - frameshift  | Malaysia         | Chinese          | 1                       | Asian                                   | 1                                   | [5]                                       |
| c.2657delA                             | p.Asn886Metfs*9                     | 11          | Deletion - frameshift  | Korea            | Korean           | 1                       |                                         | none                                | Novel                                     |
| c.2798_2799delCA                       | p.Thr933Argfs*2                     | 11          | Deletion - frameshift  | Korea            | Korean           | 7                       | Asian                                   | 1                                   | [11]                                      |
| c.2808_2811delACAA                     | p.Ala938Profs*21                    | 11          | Deletion - frameshift  | Stanford (US)    | Japanese         | 1                       |                                         | 109                                 |                                           |
|                                        |                                     |             |                        | Singapore        | Malay            | 1                       |                                         |                                     |                                           |
|                                        |                                     |             |                        | China            | Chinese          | 2                       |                                         |                                     | [20, 32]                                  |
|                                        |                                     |             |                        | Malaysia         | Chinese, Malay   | 3                       |                                         |                                     |                                           |
|                                        |                                     |             |                        | Turkey           | Turkish          | 1                       |                                         |                                     | [61]                                      |
|                                        |                                     |             |                        | Japan            | Japanese         | 1                       |                                         |                                     |                                           |
|                                        |                                     |             |                        | Hong Kong        | Chinese          | 3                       |                                         |                                     | [24]                                      |
| c.2812_2815delGCAA                     | p.Ala938Profs*21                    | 11          | Deletion - frameshift  | Indonesia        | Indonesian       | 1                       |                                         | 1                                   | [52]                                      |
| c.2830A>T                              | p.Lys944*                           | 11          | Nonsense               | Malaysia         | Chinese          | 1                       |                                         | 6                                   |                                           |
| c.2845delT                             | p.Tyr949Metfs*11                    | 11          | Deletion - frameshift  | Taiwan           | Taiwanese        | 1                       |                                         | none                                | [60]                                      |
| c.2912T>G                              | p.Leu971*                           | 11          | Nonsense               | Korea            | Korean           | 1                       |                                         | none                                | [11]                                      |
| c.2954_2957delAAAA                     | p.Lys985Ilefs*5                     | 11          | Deletion - frameshift  | Korea            | Korean           | 1                       |                                         | none                                | Novel                                     |
| c.2957delA                             | p.Asn986Ilefs*5                     | 11          | Deletion - frameshift  | Pakistan         | Muhajir          | 1                       |                                         | none                                | [7]                                       |
| c.2990T>G                              | p.Leu997*                           | 11          | Nonsense               | Pakistan         | Punjabi          | 1                       |                                         | none                                | [8]                                       |
| c.3018delA                             | p.Gly1007Valfs*36                   | 11          | Deletion - frameshift  | Korea            | Korean           | 6                       |                                         | none                                | [11]                                      |
| c.3109C>T                              | p.Gln1037*                          | 11          | Nonsense               | Los Angeles (US) | Chinese          | 4                       |                                         | 5                                   |                                           |
|                                        |                                     |             |                        | Malaysia         | Chinese          | 1                       |                                         |                                     |                                           |
|                                        |                                     |             |                        | Hong Kong        | Chinese          | 15                      |                                         |                                     | [24]                                      |
|                                        |                                     |             |                        | Pakistan         | Memon            | 2                       |                                         |                                     | [7]                                       |
|                                        |                                     |             |                        | Stanford (US)    | Chinese          | 3                       |                                         |                                     |                                           |
| c.3167_3170delAAAA                     | p.Gln1056Argfs*3                    | 11          | Deletion - frameshift  | China            | Chinese          | 1                       |                                         | 2                                   | [32]                                      |



| <b>BRCA2 mutation (nucleotide)</b> | <b>BRCA2 mutation (protein)</b> | <b>Exon</b> | <b>Mutation type</b>   | <b>Location</b>  | <b>Ethnicity</b> | <b>No. of cases</b> | <b>Asian-specific <sup>a</sup></b> | <b>BIC entries <sup>b</sup></b> | <b>References/ Novel <sup>c</sup></b> |
|------------------------------------|---------------------------------|-------------|------------------------|------------------|------------------|---------------------|------------------------------------|---------------------------------|---------------------------------------|
| c.3187C>T                          | p.Gln1063*                      | 11          | Nonsense               | Korea            | Korean           | 3                   |                                    | none                            | Novel                                 |
| c.3189_3192delGTCA                 | p.Ser1064Ilefs*12               | 11          | Deletion - frameshift  | Turkey           | Turkish          | 1                   |                                    | 1                               | [57]                                  |
| c.3195_3198delTAAT                 | p.Asn1066Leufs*10               | 11          | Deletion - frameshift  | Japan            | Japanese         | 1                   |                                    | 2                               |                                       |
|                                    |                                 |             |                        | China            | Chinese          | 2                   |                                    |                                 | [20, 32]                              |
| c.3202delG                         | p.Val1068Tyrfs*9                | 11          | Deletion - frameshift  | Hong Kong        | Chinese          | 1                   |                                    | none                            | [24]                                  |
|                                    | p.Gln1073*                      | 11          | Nonsense               | Stanford (US)    | Chinese          | 1                   |                                    | n/a                             |                                       |
| c.3248delA                         | p.Asn1083Ilefs*4                | 11          | Deletion - frameshift  | Korea            | Korean           | 1                   |                                    | none                            | Novel                                 |
| c.3265C>T                          | p.Gln1089*                      | 11          | Nonsense               | Japan            | Japanese         | 1                   |                                    | 1                               |                                       |
| c.3352_3356delTTAGA                | p.Leu1118Argfs*7                | 11          | Deletion - frameshift  | Korea            | Korean           | 3                   |                                    | none                            | [11]                                  |
| c.3362C>G                          | p.Ser1121*                      | 11          | Nonsense               | Philippines      | Filipino         | 2                   | Asian                              | 4                               | [53]                                  |
| c.3570delG                         | p.Lys1191Serfs*6                | 11          | Deletion - frameshift  | Philippines      | Filipino         | 1                   | Asian                              | 1                               | [53]                                  |
| c.3599_3600delGT                   | p.Cys1200*                      | 11          | Deletion - frameshift  | Japan            | Japanese         | 1                   |                                    | 6                               |                                       |
|                                    |                                 |             |                        | Malaysia         | Chinese          | 1                   |                                    |                                 |                                       |
|                                    |                                 |             |                        | Korea            | Korean           | 3                   |                                    |                                 | [11]                                  |
|                                    |                                 |             |                        | Philippines      | Filipino         | 1                   |                                    |                                 | [53]                                  |
| c.3685delG                         | p.Val1229Phefs*10               | 11          | Deletion - frameshift  | Pakistan         | Sindhi           | 1                   | Asian                              | 1                               | [7]                                   |
| c.3744_3747delTGAG                 | p.Ser1248Argfs*10               | 11          | Deletion - frameshift  | Los Angeles (US) | Korean           | 1                   |                                    | 8                               |                                       |
|                                    |                                 |             |                        | Korea            | Korean           | 24                  |                                    |                                 | [11]                                  |
|                                    |                                 |             |                        | China            | Chinese          | 1                   |                                    |                                 | [20]                                  |
| c.3751dupA                         | p.Thr1251Asnfs*14               | 11          | Insertion - frameshift | Iran             | Iranian          | 1                   |                                    | none                            | [6]                                   |
| c.3824_3827delTAGA                 | p.Ile1275Lysfs*8                | 11          | Deletion - frameshift  | Pakistan         | Punjabi          | 1                   |                                    | none                            | [8]                                   |
| c.3845_3846delICT                  | p.Thr1282Serfs*3                | 11          | Deletion - frameshift  | Singapore        | Chinese          | 1                   |                                    | none                            | Novel                                 |
| c.3865_3868delAAAT                 | p.Lys1289Alafs*3                | 11          | Deletion - frameshift  | Malaysia         | Indian           | 1                   |                                    | 3                               |                                       |
| c.4021delT                         | p.Ser1341Glnfs*33               | 11          | Deletion - frameshift  | Los Angeles (US) | Japanese         | 1                   |                                    | none                            | Novel                                 |
| c.4037_4038delICT                  | p.Thr1346Serfs*5                | 11          | Deletion - frameshift  | Malaysia         | Malay            | 2                   | Asian                              | 5                               | [5]                                   |
|                                    |                                 |             |                        | Philippines      | Filipino         | 2                   |                                    |                                 | [53]                                  |
| c.4078delG                         | p.Asp1360Ilefs*14               | 11          | Deletion - frameshift  | Bangladesh       | Bangladeshi      | 1                   |                                    | none                            | Novel                                 |
| c.4121delA                         | p.Lys1374Argfs*14               | 11          | Deletion - frameshift  | Hong Kong        | Chinese          | 1                   |                                    | none                            | [24]                                  |
| c.4151delT                         | p.Leu1384Cysfs*4                | 11          | Deletion - frameshift  | Singapore        | Chinese          | 2                   |                                    | none                            | [12]                                  |
| c.4398delA                         | p.Leu1466Phefs*5                | 11          | Deletion - frameshift  | Stanford (US)    | Chinese          | 1                   |                                    | none                            | Novel                                 |
| c.4459_4460insC                    | p.Lys1487Thrfs*27               | 11          | Insertion - frameshift | Stanford (US)    | Korean           | 1                   |                                    | none                            | Novel                                 |
| c.4460_4461delAA                   | p.Lys1487Thrfs*26               | 11          | Deletion - frameshift  | Stanford (US)    | Chinese          | 1                   |                                    | none                            | Novel                                 |

| <b>BRCA2 mutation<br/>(nucleotide)</b> | <b>BRCA2 mutation<br/>(protein)</b> | <b>Exon</b> | <b>Mutation type</b>   | <b>Location</b>  | <b>Ethnicity</b>              | <b>No. of<br/>cases</b> | <b>Asian-<br/>specific <sup>a</sup></b> | <b>BIC<br/>entries <sup>b</sup></b> | <b>References/<br/>Novel <sup>c</sup></b> |
|----------------------------------------|-------------------------------------|-------------|------------------------|------------------|-------------------------------|-------------------------|-----------------------------------------|-------------------------------------|-------------------------------------------|
| c.4478_4481delAAAAG                    | p.Glu1493Valfs*10                   | 11          | Deletion - frameshift  | Vietnam          | Vietnamese                    | 1                       |                                         | 33                                  | [9]                                       |
| c.4563_4564delGT                       | p.Leu1522Glyfs*6                    | 11          | Deletion - frameshift  | Hong Kong        | Chinese                       | 1                       |                                         | none                                | [24]                                      |
| c.4570_4573delTTTC                     | p.Phe1524Ilefs*18                   | 11          | Deletion - frameshift  | Bangladesh       | Bangladeshi                   | 1                       |                                         | none                                | Novel                                     |
| c.4631delA                             | p.Asn1544Thrfs*24                   | 11          | Deletion - frameshift  | Stanford (US)    | Filipino                      | 1                       |                                         | 13                                  |                                           |
|                                        |                                     |             |                        | Philippines      | Filipino                      | 4                       |                                         |                                     | [53]                                      |
| c.4638_4639insT                        | p.Asp1547*                          | 11          | Insertion - frameshift | India            | Indian                        | 1                       |                                         | none                                | [13]                                      |
| c.4722dupA                             | p.Asp1575Argfs*3                    | 11          | Insertion - frameshift | Los Angeles (US) | Japanese/ England/<br>Ireland | 1                       |                                         | none                                | Novel                                     |
| c.4731dupA                             | p.Glu1577fs                         | 11          | Insertion - frameshift | Pakistan         | Pathan                        | 1                       |                                         | none                                | [34]                                      |
| c.4829_4830delTG                       | p.Val1610Glyfs*4                    | 11          | Deletion - frameshift  | Pakistan         | Parsi, Punjabi                | 2                       |                                         | 4                                   | [7, 8]                                    |
| c.4894_4895delAG                       | p.Ser1632Tyrfs*6                    | 11          | Deletion - frameshift  | Korea            | Korean                        | 2                       |                                         | none                                | [11]                                      |
| c.4936_4939delGAAA                     | p.Glu1646Glnfs*23                   | 11          | Deletion - frameshift  | Israel           | Non-Ashkenazi Jew             | 1                       |                                         | 28                                  | [22]                                      |
| c.4965delC                             | p.Tyr1655*                          | 11          | Deletion - frameshift  | Stanford (US)    | Chinese                       | 2                       |                                         | 2                                   |                                           |
| c.4999dupT                             | p.Ser1667Phefs*10                   | 11          | Insertion - frameshift | India            | Indian                        | 1                       |                                         | none                                | [16]                                      |
| c.5014dupT                             | p.Tyr1672Leufs*5                    | 11          | Insertion - frameshift | India            | Indian                        | 1                       |                                         | none                                | [16]                                      |
| c.5073dupA                             | p.Trp1692Metfs*3                    | 11          | Insertion - frameshift | Malaysia         | Chinese                       | 1                       |                                         | 29                                  |                                           |
|                                        |                                     |             |                        | Turkey           | Turkish                       | 1                       |                                         |                                     | [10]                                      |
| c.5074_5075insA                        | p.Trp1692*                          | 11          | Insertion - frameshift | Pakistan         | Punjabi                       | 1                       |                                         | 4                                   | [7]                                       |
| c.5116_5119delAATA                     | p.Asn1706Leufs*5                    | 11          | Deletion - frameshift  | Korea            | Korean                        | 2                       |                                         | 1                                   | [11]                                      |
|                                        |                                     |             |                        | Thailand         | Thai                          | 2                       |                                         |                                     | [34]                                      |
| c.5130_5133delTGTA                     | p.Tyr1710*                          | 11          | Deletion - frameshift  | Los Angeles (US) | Chinese                       | 1                       |                                         | 8                                   |                                           |
|                                        |                                     |             |                        | Japan            | Japanese                      | 1                       |                                         |                                     |                                           |
| c.5141_5144delATTT                     | p.Tyr1714Cysfs*10                   | 11          | Deletion - frameshift  | Korea            | Korean                        | 4                       |                                         | 2                                   |                                           |
| c.5164_5165delAG                       | p.Ser1722Tyrfs*4                    | 11          | Deletion - frameshift  | Stanford (US)    | Chinese                       | 1                       | Asian                                   | 2                                   |                                           |
|                                        |                                     |             |                        | China            | Chinese                       | 1                       |                                         |                                     | [32]                                      |
|                                        |                                     |             |                        | Hong Kong        | Chinese                       | 3                       |                                         |                                     | [24]                                      |
| c.5171delT                             | p.Ile1724Lysfs*17                   | 11          | Deletion - frameshift  | China            | Chinese                       | 1                       |                                         | none                                | [32]                                      |
| c.5218_5223delTTAAGT                   | p.Leu1740_Ser1741del                | 11          | In frame deletion      | Hong Kong        | Chinese                       | 1                       |                                         | none                                | [24]                                      |
| c.5238dupT                             | p.Asn1747*                          | 11          | Insertion - frameshift | Hong Kong        | Chinese                       | 1                       |                                         | 8                                   |                                           |
| c.5299_5307delAAACTTGATdel             | p.Lys1767_Asp1769del                | 11          | In frame deletion      | Thailand         | Thai                          | 5                       | Asian                                   | 1                                   | [28]                                      |

| <b>BRCA2 mutation<br/>(nucleotide)</b> | <b>BRCA2 mutation<br/>(protein)</b> | <b>Exon</b> | <b>Mutation type</b>   | <b>Location</b>  | <b>Ethnicity</b>            | <b>No. of<br/>cases</b> | <b>Asian-<br/>specific <sup>a</sup></b> | <b>BIC<br/>entries <sup>b</sup></b> | <b>References/<br/>Novel <sup>c</sup></b> |
|----------------------------------------|-------------------------------------|-------------|------------------------|------------------|-----------------------------|-------------------------|-----------------------------------------|-------------------------------------|-------------------------------------------|
| c.5351delA                             | p.Asn1784Thrfs*7                    | 11          | Deletion - frameshift  | Korea            | Korean                      | 2                       |                                         | 5                                   | [11]                                      |
| c.5471delA                             | p.Asn1824Metfs*16                   | 11          | Deletion - frameshift  | Korea            | Korean                      | 2                       |                                         | none                                | [11]                                      |
| c.5482_5486delAAATT                    | p.Lys1828Valfs*4                    | 11          | Deletion - frameshift  | Los Angeles (US) | Japanese                    | 1                       |                                         | 4                                   |                                           |
| c.5576_5579delTTAA                     | p.Ile1859Lysfs*3                    | 11          | Deletion - frameshift  | Malaysia         | Chinese                     | 1                       |                                         | 29                                  |                                           |
|                                        |                                     |             |                        | Japan            | Japanese                    | 4                       |                                         |                                     | [23]                                      |
|                                        |                                     |             |                        | Korea            | Korean                      | 15                      |                                         |                                     | [25]                                      |
|                                        |                                     |             |                        | China            | Chinese                     | 2                       |                                         |                                     | [20, 32]                                  |
|                                        |                                     |             |                        | Singapore        | Chinese                     | 1                       |                                         |                                     | [12]                                      |
|                                        |                                     |             |                        | Lebanon          | Lebanese                    | 1                       |                                         |                                     | [19]                                      |
| c.5622_5628delTAAGGAA                  | p.Lys1875Thrfs*32                   | 11          | Deletion - frameshift  | Bangladesh       | Bangladeshi                 | 1                       |                                         | none                                | Novel                                     |
| c.5641_5644delAAAT                     | p.Lys1881Glnfs*27                   | 11          | Deletion - frameshift  | Pakistan         | Sindhi                      | 1                       |                                         | 3                                   | [7]                                       |
| c.5645C>A                              | p.Ser1882*                          | 11          | Nonsense               | Malaysia         | Chinese                     | 1                       |                                         | 27                                  |                                           |
|                                        |                                     |             |                        | Korea            | Korean                      | 1                       |                                         |                                     | [11]                                      |
|                                        |                                     |             |                        | Japan            | Japanese                    | 2                       |                                         |                                     | [23]                                      |
|                                        |                                     |             |                        | Stanford (US)    | Japanese                    | 1                       |                                         |                                     |                                           |
| c.5656C>T                              | p.Gln1886*                          | 11          | Nonsense               | Korea            | Korean                      | 4                       |                                         | 2                                   | [11]                                      |
| c.5675delG                             | p.Gly1892Valfs*17                   | 11          | Deletion - frameshift  | Japan            | Japanese                    | 1                       |                                         | none                                | Novel                                     |
| c.5681dupA                             | p.Tyr1894*                          | 11          | Insertion - frameshift | China            | Chinese                     | 1                       |                                         | 5                                   | [20]                                      |
|                                        |                                     |             |                        | Stanford (US)    | Asian/Caucasian,<br>Chinese | 3                       |                                         |                                     |                                           |
| c.5722_5723delICT                      | p.Leu1908Argfs*2                    | 11          | Deletion - frameshift  | Stanford (US)    | Chinese                     | 1                       |                                         | 42                                  |                                           |
|                                        |                                     |             |                        | China            | Chinese                     | 1                       |                                         |                                     | [20]                                      |
|                                        |                                     |             |                        | Hong Kong        | Chinese                     | 1                       |                                         |                                     | [24]                                      |
|                                        |                                     |             |                        | Pakistan         | Punjabi                     | 1                       |                                         |                                     | [7]                                       |
| c.5734G>T                              | p.Glu1912*                          | 11          | Nonsense               | Pakistan         | Punjabi                     | 1                       |                                         | none                                | [8]                                       |
| c.5851_5854delAGTT                     | p.Ser1951Trpfs*11                   | 11          | Deletion - frameshift  | Stanford (US)    | Chinese                     | 1                       |                                         | 11                                  |                                           |
|                                        |                                     |             |                        | Hong Kong        | Chinese                     | 1                       |                                         |                                     | [24]                                      |
|                                        |                                     |             |                        | India            | Indian                      | 1                       |                                         |                                     | [13]                                      |
| c.5855_5856insAGTT                     | p.Glu1953Valfs*8                    | 11          | Insertion - frameshift | Philippines      | Filipino                    | 1                       |                                         | none                                |                                           |
| c.5864C>G                              | p.Ser1955*                          | 11          | Nonsense               | China            | Chinese                     | 2                       |                                         | none                                | [32]                                      |
| c.5935dupA                             | p.Ser1979Lysfs*24                   | 11          | Insertion - frameshift | Stanford (US)    | Indonesian/Czech            | 1                       |                                         | none                                | Novel                                     |
| c.5952dupA                             | p.Ser1985Ilefs*18                   | 11          | Insertion - frameshift | India            | Indian                      | 1                       |                                         | none                                | [16]                                      |

| <b>BRCA2 mutation (nucleotide)</b> | <b>BRCA2 mutation (protein)</b> | <b>Exon</b> | <b>Mutation type</b>   | <b>Location</b>  | <b>Ethnicity</b> | <b>No. of cases</b> | <b>Asian-specific <sup>a</sup></b> | <b>BIC entries <sup>b</sup></b> | <b>References/ Novel <sup>c</sup></b> |
|------------------------------------|---------------------------------|-------------|------------------------|------------------|------------------|---------------------|------------------------------------|---------------------------------|---------------------------------------|
| c.5967dupA                         | p.Asp1990Argfs*13               | 11          | Insertion - frameshift | Malaysia         | Malay            | 1                   | Asian                              | 1                               | [5]                                   |
| c.5994delA                         | p.Val1999Cysfs*5                | 11          | Deletion - frameshift  | Korea            | Korean           | 4                   |                                    | none                            | Novel                                 |
| c.6012_6016delAGATA                | p.Asp2005Tyrfs*11               | 11          | Deletion - frameshift  | Los Angeles (US) | Chinese          | 1                   |                                    | none                            |                                       |
| c.6033_6034delTT                   | p.Ser2012Glnfs*5                | 11          | Deletion - frameshift  | China            | Chinese          | 1                   |                                    | none                            | [20]                                  |
| c.6033_6034insGT                   | p.Ser2012Valfs*29               | 11          | Insertion - frameshift | Iran             | Iranian          | 1                   |                                    | none                            | [6]                                   |
| c.6082G>T                          | p.Glu2028*                      | 11          | Nonsense               | Korea            | Korean           | 3                   |                                    | none                            | Novel                                 |
| c.6096dupT                         | p.Ile2033Tyrfs*16               | 11          | Insertion - frameshift | Hong Kong        | Chinese          | 1                   |                                    | none                            | [24]                                  |
| c.6148_6149insAA                   | p.Val2050Glnfs*2                | 11          | Insertion - frameshift | India            | Indian           | 1                   |                                    | none                            | [14]                                  |
| c.6154delT                         | p.Ser2052Hisfs*18               | 11          | Deletion - frameshift  | Thailand         | Thai             | 2                   | Asian                              | 1                               | [28]                                  |
| c.6240dupA                         | p.Glu2081Argfs*4                | 11          | Insertion - frameshift | Hong Kong        | Chinese          | 1                   |                                    | 3                               |                                       |
| c.6263_6267delCTGAG                | p.Glu2089*                      | 11          | Deletion - frameshift  | Japan            | Japanese         | 1                   |                                    | none                            | Novel                                 |
| c.6325_6326delGT                   | p.Val2109*                      | 11          | Deletion - frameshift  | Malaysia         | Chinese          | 1                   | Asian                              | 1                               | [5]                                   |
| c.6353_6366del14                   | p.Val2118Glyfs*6                | 11          | Deletion - frameshift  | Korea            | Korean           | 1                   |                                    | none                            | [11]                                  |
| c.6405_6409delCTTAA                | p.Asn2135Lysfs*3                | 11          | Deletion - frameshift  | India            | Indian           | 1                   |                                    | 13                              | [50]                                  |
| c.6428delC                         | p.Ser2143*                      | 11          | Nonsense               | Turkey           | Turkish          | 1                   |                                    | none                            | [10]                                  |
| c.6446_6450delTTAAA                | p.Ile2149Serfs*25               | 11          | Deletion - frameshift  | Japan            | Japanese         | 1                   |                                    | 2                               |                                       |
| c.6449_6450insTA                   | p.Lys2150Asnfs*19               | 11          | Insertion - frameshift | China            | Chinese          | 1                   |                                    | 1                               | [32]                                  |
| c.6451_6452insAA                   | p.Val2151fs                     | 11          | Insertion - frameshift | Pakistan         | Punjabi          | 1                   |                                    | none                            | [7]                                   |
| c.6468_6469delTC                   | p.Gln2157Ilefs*18               | 11          | Deletion - frameshift  | Japan            | Japanese         | 1                   |                                    | 24                              |                                       |
|                                    |                                 |             |                        | Taiwan           | Taiwanese        | 1                   |                                    |                                 | [60]                                  |
|                                    |                                 |             |                        | Pakistan         | Punjabi          | 1                   |                                    |                                 | [7]                                   |
| c.6485_6486delAA                   | p.Lys2162Thrfs*13               | 11          | Deletion - frameshift  | Los Angeles (US) | Asian            | 1                   |                                    | none                            | Novel                                 |
| c.6541G>T                          | p.Gly2181*                      | 11          | Nonsense               | Malaysia         | Malay            | 1                   |                                    | none                            | Novel                                 |
| c.6547G>T                          | p.Glu2183*                      | 11          | Nonsense               | Indonesia        | Indonesian       | 2                   |                                    | none                            | [52]                                  |
| c.6553delG                         | p.Ala2185Leufs*6                | 11          | Deletion - frameshift  | Korea            | Korean           | 3                   |                                    | 1                               | [11]                                  |
| c.6591_6592delTG                   | p.Glu2198Asnfs*4                | 11          | Deletion - frameshift  | China            | Chinese          | 3                   |                                    | 17                              | [32]                                  |
| c.6620_6623delCAAA                 | p.Thr2207Ilefs*2                | 11          | Deletion - frameshift  | Stanford (US)    | Japanese         | 1                   |                                    | none                            |                                       |
| c.6626_6627delTA                   | p.Ile2209Argfs*15               | 11          | Deletion - frameshift  | Japan            | Japanese         | 1                   |                                    | 1                               |                                       |
| c.6627_6634del8                    | p.Ile2209Metfs*13               | 11          | Deletion - frameshift  | Israel           | Moslem           | 1                   |                                    | none                            | [22]                                  |
| c.6634_6637delTGTT                 | p.Cys2212Leufs*16               | 11          | Deletion - frameshift  | Singapore        | Malay            | 1                   |                                    | none                            | [12]                                  |
| c.6645_6648delCTCC                 | p.Tyr2215*                      | 11          | Nonsense               | China            | Kazakh           | 1                   |                                    | none                            | [39]                                  |
| c.6673delA                         | p.Thr2225Glnfs*4                | 11          | Deletion - frameshift  | Malaysia         | Chinese          | 1                   | Asian                              | 1                               | [5]                                   |

| <b>BRCA2 mutation (nucleotide)</b>                   | <b>BRCA2 mutation (protein)</b> | <b>Exon</b> | <b>Mutation type</b>   | <b>Location</b>  | <b>Ethnicity</b>                | <b>No. of cases</b> | <b>Asian-specific <sup>a</sup></b> | <b>BIC entries <sup>b</sup></b> | <b>References/ Novel <sup>c</sup></b> |
|------------------------------------------------------|---------------------------------|-------------|------------------------|------------------|---------------------------------|---------------------|------------------------------------|---------------------------------|---------------------------------------|
| c.6678delA                                           | p.Ala2227Glnfs*2                | 11          | Deletion - frameshift  | Hong Kong        | Chinese                         | 1                   |                                    | 1                               |                                       |
| c.6715G>T                                            | p.Glu2239*                      | 11          | Nonsense               | Malaysia         | Chinese                         | 1                   | Asian                              | 1                               | [5]                                   |
| c.6724_6725delGA                                     | p.Asp2242Phefs*2                | 11          | Deletion - frameshift  | Korea            | Korean                          | 8                   |                                    | none                            | [25]                                  |
| c.6746_6747insA                                      | p.Thr2250Hisfs*11               | 11          | Insertion - frameshift | Stanford (US)    | Filipino                        | 1                   |                                    | none                            | Novel                                 |
| c.6800C>A                                            | p.Ser2267*                      | 11          | Nonsense               | China            | Chinese                         | 1                   |                                    | none                            | [32]                                  |
| c.6952C>T                                            | p.Arg2318*                      | 13          | Nonsense               | Korea            | Korean                          | 2                   | Asian                              | 5                               | [11]                                  |
|                                                      |                                 |             |                        | Japan            | Japanese                        | 4                   |                                    |                                 | [23]                                  |
|                                                      |                                 |             |                        | Stanford (US)    | Japanese                        | 1                   |                                    |                                 |                                       |
| c.7006delC                                           | p.Arg2336Alafs*31               | 13          | Deletion - frameshift  | Korea            | Korean                          | 2                   |                                    | none                            | Novel                                 |
|                                                      | p.Arg2336His                    | 13          | Missense               | Stanford (US)    | Chinese                         | 1                   |                                    | n/a                             |                                       |
| c.7007G>C                                            | p.Arg2336Pro                    | 13          | Missense               | Israel           | Non-Ashkenazi Jew               | 1                   |                                    | 5                               | [22]                                  |
| c.7007G>T; Deletion of exon 13                       | p.Gly2313Alafs*31               | 13          | Large deletion         | Hong Kong        | Chinese                         | 3                   | Asian                              | 1                               | [24]                                  |
| c.7007G>A                                            | p.Arg2336His                    | 13          | Missense               | Pakistan         | Punjabi                         | 1                   |                                    | 19                              | [34]                                  |
| Deletion of exon 14 to exon 23                       |                                 | 14 to 23    | Large deletion         | Los Angeles (US) | Asian                           | 1                   |                                    | n/a                             |                                       |
| Deletion of exon 14 to exon 16                       |                                 | 14 to 16    | Large deletion         | Malaysia         | Indian                          | 1                   |                                    | n/a                             | [4]                                   |
| c.7133C>G                                            | p.Ser2378*                      | 14          | Nonsense               | Malaysia         | Chinese                         | 1                   | Asian                              | 1                               |                                       |
|                                                      |                                 |             |                        | Singapore        | Chinese                         | 1                   |                                    |                                 |                                       |
| c.7258G>T                                            | p.Glu2420*                      | 14          | Nonsense               | Korea            | Korean                          | 2                   |                                    | none                            | [11]                                  |
| c.7379_7382delACAA                                   | p.Asn2460Thsfs*8                | 14          | Deletion - frameshift  | Stanford (US)    | Chinese                         | 1                   |                                    | 1                               |                                       |
| c.7379delA                                           | p.Asn2460Thsfs*9                | 14          | Deletion - frameshift  | Stanford (US)    | Chinese                         | 1                   |                                    | none                            | Novel                                 |
| c.7409dupT                                           | p.Thr2471Hisfs*4                | 14          | Insertion - frameshift | Hong Kong        | Chinese                         | 1                   |                                    | none                            | [24]                                  |
| Duplication of exon 15 to exon 18                    |                                 | 15 to 18    | Large duplication      | Stanford (US)    | Japanese,<br>Japanese/Caucasian | 5                   |                                    | n/a                             |                                       |
| r.7436_7805del370,<br>Deletion of exon 15 to exon 16 | p.Asp2479Glyfs*46               | 15 to 16    | Large deletion         | Hong Kong        | Chinese                         | 1                   |                                    | none                            | [24]                                  |
| c.7467dupT                                           | p.Ile2490Tyrfs*7                | 15          | Insertion - frameshift | Hong Kong        | Chinese                         | 1                   |                                    | none                            | [24]                                  |
| c.7471C>T                                            | p.Gln2491*                      | 15          | Nonsense               | Hong Kong        | Chinese                         | 1                   |                                    | 1                               | [24]                                  |
| c.7480C>T                                            | p.Arg2494*                      | 15          | Nonsense               | Los Angeles (US) | Korean                          | 1                   |                                    | 11                              |                                       |
|                                                      |                                 |             |                        | Stanford (US)    | Korean                          | 1                   |                                    |                                 |                                       |
|                                                      |                                 |             |                        | Korea            | Korean                          | 51                  |                                    |                                 | [25]                                  |
| c.7490dupA                                           | p.Lys2498Glufs*41               | 15          | Insertion - frameshift | Hong Kong        | Chinese                         | 1                   |                                    | none                            | Novel                                 |
| c.7516C>T                                            | p.Gln2506*                      | 15          | Nonsense               | Korea            | Korean                          | 1                   |                                    | none                            | Novel                                 |

| <b>BRCA2 mutation (nucleotide)</b>  | <b>BRCA2 mutation (protein)</b> | <b>Exon</b> | <b>Mutation type</b>   | <b>Location</b>  | <b>Ethnicity</b>             | <b>No. of cases</b> | <b>Asian-specific <sup>a</sup></b> | <b>BIC entries <sup>b</sup></b> | <b>References/ Novel <sup>c</sup></b> |
|-------------------------------------|---------------------------------|-------------|------------------------|------------------|------------------------------|---------------------|------------------------------------|---------------------------------|---------------------------------------|
| c.7538delC                          | p.Ala2513Glufs*11               | 15          | Deletion - frameshift  | Korea            | Korean                       | 1                   |                                    | none                            | [11]                                  |
| c.7558C>T                           | p.Arg2520*                      | 15          | Nonsense               | Malaysia         | Chinese                      | 1                   |                                    | 45                              |                                       |
|                                     |                                 |             |                        | Korea            | Korean                       | 1                   |                                    |                                 |                                       |
|                                     |                                 |             |                        | Japan            | Japanese                     | 1                   |                                    |                                 |                                       |
| c.7617+1G>A,<br>Deletion of exon 15 |                                 | IVS15       | Intervening sequence   | Singapore        | Chinese                      | 1                   |                                    | 4                               | [12]                                  |
| c.7655_7658delTTAA                  | p.Ile2552Thrfs*95               | 16          | Deletion - frameshift  | China            | Chinese                      | 1                   |                                    | 1                               | [36]                                  |
| c.7673_7674delAG                    | p.Glu2558Valfs*7                | 16          | Deletion - frameshift  | Malaysia         | Malay                        | 1                   |                                    | 4                               |                                       |
| c.7676insAAAC                       | p.Ser2559fs                     | 16          | Insertion - frameshift | Thailand         | Thai                         | 1                   |                                    | none                            | [34]                                  |
| c.7697dupA                          | p.Asp2566Glufs*5                | 16          | Insertion - frameshift | Singapore        | Chinese                      | 1                   |                                    | none                            | Novel                                 |
| c.7757G>A                           | p.Trp2586*                      | 16          | Nonsense               | Los Angeles (US) | German/ Ireland/<br>Japanese | 2                   |                                    | 5                               |                                       |
| c.7806-9T>G                         |                                 | IVS16       | Intervening sequence   | Hong Kong        | Chinese                      | 1                   |                                    | none                            | Novel                                 |
| c.7878G>A                           | p.Trp2626*                      | 17          | Nonsense               | Los Angeles (US) | Chinese                      | 2                   |                                    | none                            |                                       |
|                                     |                                 |             |                        | Hong Kong        | Chinese                      | 5                   |                                    |                                 | [24]                                  |
| c.7963delC                          | p.Gln2655Asnfs*2                | 17          | Deletion - frameshift  | China            | Chinese                      | 1                   |                                    | none                            | [32]                                  |
| c.7976+1G>A                         |                                 | IVS17       | Intervening sequence   | Malaysia         | Indian, Chinese              | 2                   |                                    | 1                               | [5]                                   |
|                                     |                                 |             |                        | China            | Chinese                      | 1                   |                                    |                                 | [20]                                  |
|                                     |                                 |             |                        | Hong Kong        | Chinese                      | 1                   |                                    |                                 | [24]                                  |
| c.7976+5G>A                         | p.Ala2603_Arg2659del57          | IVS17       | Intervening sequence   | Hong Kong        | Chinese                      | 1                   |                                    | none                            | Novel                                 |
| c.7977-1G>T                         |                                 | IVS17       | Intervening sequence   | Stanford (US)    | Chinese                      | 1                   |                                    | 1                               |                                       |
| c.8002_8008dupAGAAGAT               | p.Arg2669Leufs*2                | 18          | Insertion - frameshift | Korea            | Korean                       | 1                   |                                    | none                            | [11]                                  |
| c.8009C>T                           | p.Ser2670Leu                    | 18          | Missense               | Japan            | Japanese                     | 1                   |                                    | 9                               |                                       |
|                                     | p.Ser2670*                      | 18          | Nonsense               | Los Angeles (US) | Japanese                     | 1                   |                                    | n/a                             |                                       |
| c.8023A>G                           | p.Ile2675Val                    | 18          | Missense               | Japan            | Japanese                     | 2                   |                                    | none                            | Novel                                 |
| c.8029delG                          | p.Glu2677Lysfs*17               | 18          | Deletion - frameshift  | Stanford (US)    | Chinese/ Pacific<br>Islander | 1                   |                                    | 2                               |                                       |
| c.8068_8069delIGT                   | p.Val2690Phefs*2                | 18          | Deletion - frameshift  | Hong Kong        | Chinese                      | 2                   |                                    | 1                               | [24]                                  |
| c.8140C>T                           | p.Gln2714*                      | 18          | Nonsense               | Korea            | Korean                       | 3                   |                                    | 1                               |                                       |
| c.8207_8208insAG                    | p.Leu2737Alafs*2                | 18          | Insertion - frameshift | Stanford (US)    | Chinese                      | 1                   |                                    | none                            | Novel                                 |
| c.8234dupT                          | p.Thr2746Aspfs*18               | 18          | Insertion - frameshift | China            | Chinese                      | 1                   | Asian                              | 1                               | [20]                                  |

| <b>BRCA2 mutation (nucleotide)</b>     | <b>BRCA2 mutation (protein)</b> | <b>Exon</b> | <b>Mutation type</b>   | <b>Location</b>  | <b>Ethnicity</b>        | <b>No. of cases</b> | <b>Asian-specific <sup>a</sup></b> | <b>BIC entries <sup>b</sup></b> | <b>References/ Novel <sup>c</sup></b> |
|----------------------------------------|---------------------------------|-------------|------------------------|------------------|-------------------------|---------------------|------------------------------------|---------------------------------|---------------------------------------|
| c.8234_8237delTGAC                     | p.Leu2745Glnfs*31               | 18          | Deletion - frameshift  | Malaysia         | Chinese                 | 1                   |                                    | 2                               |                                       |
| c.8299_8300insAC                       | p.Pro2767Hisfs*11               | 18          | Insertion - frameshift | Korea            | Korean                  | 1                   |                                    | none                            | [11]                                  |
| c.8314G>T                              | p.Glu2772*                      | 18          | Nonsense               | Korea            | Korean                  | 2                   |                                    | none                            | [25]                                  |
| c.8329A>T                              | p.Lys2777*                      | 18          | Nonsense               | Korea            | Korean                  | 1                   |                                    | none                            | Novel                                 |
| c.8331+1G>A                            |                                 | IVS18       | Intervening sequence   | Stanford (US)    | Indonesian              | 1                   |                                    | none                            |                                       |
|                                        |                                 |             |                        | China            | Chinese                 | 1                   |                                    |                                 | [32]                                  |
| c.8348_8349insC                        | p.Arg2784Serfs*14               | 19          | Insertion - frameshift | India            | Indian                  | 1                   |                                    | none                            | [14]                                  |
| c.8400_8401del4ins5                    | Stop 2811                       | 19          | Frameshift             | China            | Chinese                 | 2                   |                                    | none                            | [32]                                  |
| c.8400_8402delinsAAAA                  | p.Phe2801Lysfs*11               | 19          | Frameshift             | Hong Kong        | Chinese                 | 1                   |                                    | none                            | Novel                                 |
| c.8435_8436ins19                       |                                 | 19          | Insertion - frameshift | Japan            | Japanese                | 1                   |                                    | none                            | Novel                                 |
| c.8470A>T                              | p.Arg2824*                      | 19          | Nonsense               | Hong Kong        | Chinese                 | 1                   |                                    | none                            | Novel                                 |
| c.8504C>A                              | p.Ser2835*                      | 20          | Nonsense               | Japan            | Japanese                | 1                   |                                    | 1                               | [23]                                  |
|                                        |                                 |             |                        | Los Angeles (US) | Indonesian/German/Dutch | 1                   |                                    | n/a                             |                                       |
| c.8537_8538delAG                       | p.Glu2846Glyfs*22               | 20          | Deletion - frameshift  | Korea            | Korean                  | 1                   |                                    | 75                              | [11]                                  |
|                                        |                                 |             |                        | Yemen            | Yemenite                | 3                   |                                    |                                 | [62]                                  |
| c.8589dupA                             | p.Ala2864Serfs*5                | 20          | Insertion - frameshift | Japan            | Japanese                | 1                   |                                    | none                            | [33]                                  |
| c.8633-2A>T                            |                                 | IVS20       | Intervening sequence   | Korea            | Korean                  | 1                   |                                    | none                            | [11]                                  |
| r.8633_8754del122, Deletion of exon 21 | p.Glu2878Glyfs*5                | 21          | Large deletion         | Hong Kong        | Chinese                 | 1                   |                                    | none                            | [24]                                  |
| c.8668delC                             | p.Leu2890*                      | 21          | Deletion - frameshift  | Japan            | Japanese                | 1                   |                                    | none                            | Novel                                 |
| c.8677C>T                              | p.Gln2893*                      | 21          | Nonsense               | Japan            | Japanese                | 1                   |                                    | none                            |                                       |
|                                        |                                 |             |                        | Israel           | Non-Ashkenazi Jew       | 1                   |                                    |                                 | [22]                                  |
| c.8717_8718delAA                       | p.Glu2906Glyfs*12               | 21          | Deletion - frameshift  | Korea            | Korean                  | 1                   |                                    | none                            | [11]                                  |
| c.8820_8823delACAA                     | p.Gln2941Leufs*34               | 22          | Deletion - frameshift  | China            | Chinese                 | 2                   |                                    | none                            | [20, 32]                              |
| c.8827_8828insG                        | p.Gln2943Argfs*7                | 22          | Insertion - frameshift | Korea            | Korean                  | 1                   |                                    | none                            | [11]                                  |
| c.8869C>T                              | p.Gln2957*                      | 22          | Nonsense               | Malaysia         | Indian                  | 1                   | Asian                              | 1                               | [5]                                   |
| c.8890dupA                             | p.Arf2964Lysfs*54               | 22          | Insertion - frameshift | Singapore        | Chinese                 | 1                   |                                    | none                            | [12]                                  |
| c.8912delA                             | p.Lys2971Serfs*5                | 22          | Deletion - frameshift  | Pakistan         | Muhajir                 | 1                   | Asian                              | 1                               | [7]                                   |
| c.8915delT                             | p.Leu2972Cysfs*4                | 22          | Deletion - frameshift  | Singapore        | Chinese                 | 1                   |                                    | none                            | [12]                                  |
| c.8950delT                             | p.Ser2984Glnfs*4                | 22          | Deletion - frameshift  | China            | Chinese                 | 1                   |                                    | none                            | [20]                                  |
| c.8953+1G>A                            |                                 | IVS22       | Intervening sequence   | Stanford (US)    | Malay                   | 1                   |                                    | none                            | Novel                                 |

| <b>BRCA2 mutation<br/>(nucleotide)</b> | <b>BRCA2 mutation<br/>(protein)</b> | <b>Exon</b> | <b>Mutation type</b>   | <b>Location</b>  | <b>Ethnicity</b> | <b>No. of<br/>cases</b> | <b>Asian-<br/>specific <sup>a</sup></b> | <b>BIC<br/>entries <sup>b</sup></b> | <b>References/<br/>Novel <sup>c</sup></b> |
|----------------------------------------|-------------------------------------|-------------|------------------------|------------------|------------------|-------------------------|-----------------------------------------|-------------------------------------|-------------------------------------------|
| c.8954-5A>G                            |                                     | IVS22       | Intervening sequence   | Canada           | Chinese          | 1                       |                                         | none                                | Novel                                     |
| Deletion of exon 23 to exon 24         |                                     | 23 to 24    | Large deletion         | Malaysia         | Chinese          | 1                       |                                         | n/a                                 |                                           |
| c.8958_8961delACTG                     | p.Leu2987Valfs*13                   | 23          | Deletion - frameshift  | Singapore        | Chinese          | 1                       |                                         | none                                | Novel                                     |
| c.8991T>G                              | p.Tyr2997*                          | 23          | Nonsense               | Korea            | Korean           | 2                       |                                         | none                                | [25]                                      |
| c.9007G>T                              | p.Gly3003*                          | 23          | Nonsense               | China            | Chinese          | 1                       |                                         | none                                | [32]                                      |
| c.9027delT                             | p.His3010Ilefs*18                   | 23          | Deletion - frameshift  | Turkey           | Turkish          | 1                       |                                         | 1                                   | [45]                                      |
| c.9028ins4                             | p.His3010Leufs*22                   | 23          | Insertion - frameshift | Israel           | Moslem           | 1                       |                                         | none                                | [22]                                      |
| c.9076C>T                              | p.Gln3026*                          | 23          | Nonsense               | Korea            | Korean           | 10                      |                                         | 3                                   | [11]                                      |
| c.9097dupA                             | p.Thr3033Asnfs*11                   | 23          | Insertion - frameshift | Korea            | Korean           | 3                       |                                         | none                                | [11]                                      |
|                                        |                                     |             |                        | Hong Kong        | Chinese          | 2                       |                                         |                                     | [24]                                      |
| c.9097delA                             | p.Thr3033Leufs*29                   | 23          | Deletion - frameshift  | Malaysia         | Chinese          | 1                       |                                         | none                                |                                           |
|                                        |                                     |             |                        | Korea            | Korean           | 3                       |                                         |                                     |                                           |
|                                        |                                     |             |                        | Singapore        | Chinese          | 1                       |                                         |                                     | [12]                                      |
| c.9098_9099insA                        | p.Gln3034Serfs*10                   | 23          | Insertion - frameshift | China            | Chinese          | 2                       |                                         | 25                                  | [32]                                      |
|                                        |                                     |             |                        | Malaysia         | Chinese          | 1                       |                                         |                                     | [5]                                       |
| c.9100_9101insC                        | p.Gln3034Profs*10                   | 23          | Insertion - frameshift | Turkey           | Turkish          | 2                       |                                         | none                                | [63]                                      |
| c.9105T>G                              | p.Tyr3035*                          | 23          | Nonsense               | Korea            | Korean           | 2                       |                                         | none                                | Novel                                     |
| c.9117G>A                              | p.Pro3039=                          | 23          | Synonymous             | Canada           | Chinese          | 1                       |                                         | 14                                  |                                           |
|                                        |                                     |             |                        | Korea            | Korean           | 7                       |                                         |                                     | [11]                                      |
|                                        |                                     |             |                        | Japan            | Japanese         | 2                       |                                         |                                     | [23]                                      |
| c.9117+1G>A                            |                                     | IVS23       | Intervening sequence   | Korea            | Korean           | 1                       |                                         | 1                                   |                                           |
| c.9118-7_9121del11                     |                                     | IVS23       | Intervening sequence   | Korea            | Korean           | 1                       |                                         | none                                | Novel                                     |
| c.9134delT                             | p.Leu3045Tyrfs*17                   | 24          | Deletion - frameshift  | Korea            | Korean           | 1                       |                                         | none                                | Novel                                     |
| c.9253dupA                             | p.Thr3085Asnfs*26                   | 24          | Insertion - frameshift | Korea            | Korean           | 2                       |                                         | 19                                  | [11]                                      |
| c.9253delA                             | p.Thr3085Glnfs*19                   | 24          | Deletion - frameshift  | Korea            | Korean           | 6                       |                                         | none                                | [25]                                      |
|                                        |                                     |             |                        | China            | Kazakh           | 1                       |                                         |                                     | [39]                                      |
| c.9257-1G>A                            |                                     | IVS24       | Intervening sequence   | Israel           | Moslem           | 1                       |                                         | 2                                   | [22]                                      |
| c.9257-1G>A                            |                                     | IVS24       | Intervening sequence   | Lebanon          | Lebanese         | 1                       |                                         | none                                | [19]                                      |
| c.9275_9276delAT                       | p.Tyr3092Phefs*18                   | 25          | Deletion - frameshift  | Korea            | Korean           | 5                       |                                         | none                                | [11]                                      |
| c.9294C>G                              | p.Tyr3098*                          | 25          | Nonsense               | Hong Kong        | Chinese          | 3                       |                                         | 17                                  |                                           |
|                                        |                                     |             |                        | Stanford (US)    | Chinese          | 1                       |                                         |                                     |                                           |
| c.9317G>A                              | p.Trp3106*                          | 25          | Nonsense               | Los Angeles (US) | Vietnamese       | 2                       |                                         | 1                                   |                                           |



| <b><i>BRCA2</i> mutation (nucleotide)</b> | <b><i>BRCA2</i> mutation (protein)</b> | <b>Exon</b> | <b>Mutation type</b>   | <b>Location</b>    | <b>Ethnicity</b>    | <b>No. of cases</b> | <b>Asian-specific <sup>a</sup></b> | <b>BIC entries <sup>b</sup></b> | <b>References/ Novel <sup>c</sup></b> |
|-------------------------------------------|----------------------------------------|-------------|------------------------|--------------------|---------------------|---------------------|------------------------------------|---------------------------------|---------------------------------------|
| r.9354_9816del463                         | p.Met3118Ilefs*3                       | 25 to 27    | Large deletion         | Hong Kong          | Chinese             | 1                   |                                    | none                            |                                       |
| c.9356_9357delTAinsG                      | p.Leu3119*                             | 25          | Frameshift             | China              | Chinese             | 1                   |                                    | none                            | [32]                                  |
| c.9380G>A                                 | p.Trp3127*                             | 25          | Nonsense               | Los Angeles (US)   | Indian/Pakistani    | 1                   |                                    | 5                               |                                       |
| c.9382C>T                                 | p.Arg3128*                             | 25          | Nonsense               | Hong Kong<br>Japan | Chinese<br>Japanese | 1<br>1              |                                    | 50                              | [23]                                  |
| c.9393delC                                | p.Lys3132Asnfs*31                      | 25          | Deletion - frameshift  | Hong Kong          | Chinese             | 1                   |                                    | none                            | [24]                                  |
| c.9401delG                                | p.Gly3134Alafs*29                      | 25          | Deletion - frameshift  | Hong Kong          | Chinese             | 1                   |                                    | 2                               |                                       |
| c.9430delT                                | p.Ser3144Leufs*19                      | 25          | Deletion - frameshift  | Pakistan           | Pakistani           | 1                   |                                    | none                            | [8]                                   |
| c.9440dupC                                | p.Ala3148Cysfs*2                       | 25          | Insertion - frameshift | Korea              | Korean              | 2                   |                                    | none                            | Novel                                 |
| c.9771delA                                | p.Glu3258Argfs*17                      | 27          | Deletion - frameshift  | India              | Indian              | 1                   |                                    | none                            | [14]                                  |
| c.10150C>T                                | p.Arg3384*                             | 27          | Nonsense               | Korea<br>Hong Kong | Korean<br>Chinese   | 1<br>1              |                                    | none                            | [64]<br>[24]                          |

*BRCA2* reference sequence (GenBank accession no.: U43746.1). Numbering of the nucleotides begins at the transcription start site ATG. Mutations for nucleotide and protein sequences are designated according to the HGVS nomenclature guidelines.

<sup>a</sup> Asian-specific mutations; *BRCA2* mutations that have been reported only in the Asian ethnicities in Breast Cancer Information Core (BIC) Database.

<sup>b</sup> none: Mutations that have not been listed in BIC Database. n/a: Information on large genome re-arrangements are not available in the BIC Database.; or the nucleotide change data was missing and thus cannot be matched to the BIC Database.

<sup>c</sup> Novel mutations that have not been reported in literature nor listed in BIC database.

## References:

1. Al-Moundhri MS, Al-Ansari A, Al-Mawali K, Al-Bahrani B. BRCA1 gene Molecular Alterations in Omani Breast Cancer Patients. *Gulf J Oncolog* 2013;**1**:45-51.
2. Aktas D, Gultekin M, Kabacam S, Alikasifoglu M, Turan AT, Tulunay G, Kose MF, Ortac F, Yuce K, Tuncbilek E, Ayhan A. Identification of point mutations and large rearrangements in the BRCA1 gene in 667 Turkish unselected ovarian cancer patients. *Gynecol Oncol* 2010;**119**:131-5.
3. Kwong A, Ng EKO, Law FBF, Wong HN, Wa A, Wong CLP, Kurian AW, West DW, Ford JM, Ma ESK. Novel BRCA1 and BRCA2 genomic rearrangements in Southern Chinese breast/ovarian cancer patients. *Breast Cancer Res Treat* 2012;**136**:931-33.
4. Kang P, Mariapun S, Phuah SY, Lim LS, Liu JJ, Yoon SY, Thong MK, Taib NAM, Yip CH, Teo SH. Large BRCA1 and BRCA2 genomic rearrangements in Malaysian high risk breast-ovarian cancer families. *Breast Cancer Res Treat* 2010;**124**:579-84.
5. Thirthagiri E, Lee SY, Kang P, Lee DS, Toh GT, Selamat S, Yoon SY, Taib NA, Thong MK, Yip CH, Teo SH. Evaluation of BRCA1 and BRCA2 mutations and risk-prediction models in a typical Asian country (Malaysia) with a relatively low incidence of breast cancer. *Breast Cancer Res Treat* 2008;**10**:R59.
6. Yassaee VR, Zeinali S, Harirchi I, Jarvandi S, Mohagheghi MA, Hornby DP, Dalton A. Novel mutations in the BRCA1 and BRCA2 genes in Iranian women with early-onset breast cancer. *Breast Cancer Res* 2002;**4**.
7. Liede A, Malik IA, Aziz Z, de los Rios P, Kwan E, Narod SA. Contribution of BRCA1 and BRCA2 mutations to breast and ovarian cancer in Pakistan. *Am J Hum Genet* 2002;**71**:595-606.
8. Rashid MU, Zaidi A, Torres D, Sultan F, Benner A, Naqvi B, Shakoori AR, Seidel-Renkert A, Farooq H, Narod S, Amin A, Hamann U. Prevalence of BRCA1 and BRCA2 mutations in Pakistani breast and ovarian cancer patients. *Int J Cancer* 2006;**119**:2832-39.
9. Ginsburg OM, Dinh NV, To TV, Quang LH, Linh ND, Duong BT, Royer R, Llacuachaqui M, Tulman A, Vichodez G, Li S, Love RR, Narod SA. Family history, BRCA mutations and breast cancer in Vietnamese women. *Clin Genet* 2011;**80**:89-92.
10. Yazici H, Bitisik O, Akisik E, Cabioglu N, Saip P, Muslumanoglu M, Glendon G, Bengisu E, Ozbilen S, Dincer M, Turkmen S, Andrulis IL, Dalay N, Ozelik H. BRCA1 and BRCA2 mutations in Turkish breast/ovarian families and young breast cancer patients. *Br J Cancer* 2000;**83**:737-42.
11. Kim H, Cho DY, Choi DH, Choi SY, Shin I, Park W, Huh SJ, Han SH, Lee MH, Ahn SH, Son BH, Kim SW, Haffty BG. Characteristics and spectrum of BRCA1 and BRCA2 mutations in 3,922 Korean patients with breast and ovarian cancer. *Breast Cancer Res Treat* 2012;**134**:1315-26.

12. Ang P, Lim IHK, Lee TC, Luo JT, Ong DCT, Tan PH, Lee ASG. BRCA1 and BRCA2 mutations in an Asian clinic-based population detected using a comprehensive strategy. *Cancer Epidemiol Biomarkers Prev* 2007;**16**:2276-84.
13. Vaidyanathan K, Lakhota S, Ravishankar HM, Tabassum U, Mukherjee G, Somasundaram K. BRCA1 and BRCA2 germline mutation analysis among Indian women from south India: identification of four novel mutations and high-frequency occurrence of 185delAG mutation. *J Biosci* 2009;**34**:415-22.
14. Saxena S, Chakraborty A, Kaushal M, Kotwal S, Bhatanagar D, Mohil RS, Chintamani C, Aggarwal AK, Sharma VK, Sharma PC, Lenoir G, Goldgar DE, Szabo CI. Contribution of germline BRCA1 and BRCA2 sequence alterations to breast cancer in Northern India. *BMC Med Genet* 2006;**7**.
15. Valarmathi MT, Sawhney M, Deo SS, Shukla NK, Das SN. Novel germline mutations in the BRCA1 and BRCA2 genes in Indian breast and breast-ovarian cancer families. *Hum Mutat* 2004;**23**:205.
16. Hedau S, Jain N, Husain SA, Mandal AK, Ray G, Shahid M, Kant R, Gupta V, Shukla NK, Deo SS, Das BC. Novel germline mutations in breast cancer susceptibility genes BRCA1, BRCA2 and p53 gene in breast cancer patients from India. *Breast Cancer Res Treat* 2004;**88**:177-86.
17. Bar-Sade RB, Kruglikova A, Modan B, Gak E, Hirsh-Yechezkel G, Theodor L, Novikov I, Gershoni-Baruch R, Risel S, Papa MZ, Ben-Baruch G, Friedman E. The 185delAG BRCA1 mutation originated before the dispersion of Jews in the diaspora and is not limited to Ashkenazim. *Hum Mol Genet* 1998;**7**:801-5.
18. Guran S, Ozet A, Dede M, Gille JJ, Yenen MC. Hereditary breast cancer syndromes in a Turkish population. Results of molecular germline analysis. *Cancer Genet Cytogenet* 2005;**160**:164-8.
19. Jalkh N, Nassar-Slaba J, Chouery E, Salem N, Uhrchammer N, Golmard L, Stoppa-Lyonnet D, Bignon YJ, Megarbane A. Prevalance of BRCA1 and BRCA2 mutations in familial breast cancer patients in Lebanon. *Hered Cancer Clin Pract* 2012;**10**.
20. Li WF, Hu Z, Rao NY, Song CG, Zhang B, Cao MZ, Su FX, Wang YS, He PQ, Di GH, Shen KW, Wu J, Lu JS, Luo JM, Liu XY, Zhou J, Wang L, Zhao L, Liu YB, Yuan WT, Yang L, Shen ZZ, Huang W, Shao ZM. The prevalence of BRCA1 and BRCA2 germline mutations in high-risk breast cancer patients of Chinese Han nationality: two recurrent mutations were identified. *Breast Cancer Res Treat* 2008;**110**:99-109.
21. Sekine M, Nagata H, Tsuji S, Hirai Y, Fujimoto S, Hatae M, Kobayashi I, Fujii T, Nagata I, Ushijima K, Obata K, Suzuki M, Yoshinaga M, Umesaki N, Satoh S, Enomoto T, Motoyama S, Tanaka K, Japanese Familial Ovarian Cancer Study Group. Mutational analysis of BRCA1 and BRCA2 and clinicopathologic analysis of ovarian cancer in 82 ovarian cancer families: Two common founder mutations of BRCA1 in Japanese population. *Clin Cancer Res* 2001;**7**:3144-50.

22. Laitman Y, Borsthein RT, Stoppa-Lyonnet D, Dagan E, Castera L, Goislard M, Gershoni-Baruch R, Goldberg H, Kaufman B, Ben-Baruch N, Zidan J, Maray T, Soussan-Gutman L, Friedman E. Germline mutations in BRCA1 and BRCA2 genes in ethnically diverse high risk families in Israel. *Breast Cancer Res Treat* 2011;**127**:489-95.
23. Sugano K, Nakamura S, Ando J, Takayama S, Kamata H, Sekiguchi I, Ubukata M, Kodama T, Arai M, Kasumi F, Hirai Y, Ikeda T, Jinno H, Kitajima M, Aoki D, Hirasawa A, Takeda Y, Yazaki K, Fukutomi T, Kinoshita T, Tsunematsu R, Yoshida T, Izumi M, Umezawa S, Yagata H, Komatsu H, Arimori N, Matoba N, Gondo N, Yokoyama S, Miki Y. Cross-sectional analysis of germline BRCA1 and BRCA2 mutations in Japanese patients suspected to have hereditary breast/ovarian cancer. *Cancer Sci* 2008;**99**:1967-76.
24. Kwong A, Ng EKO, Wong CLP, Law FBF, Au T, Wong HN, Kurian AW, West DW, Ford JM, Ma ESK. Identification of BRCA1/2 Founder Mutations in Southern Chinese Breast Cancer Patients Using Gene Sequencing and High Resolution DNA Melting Analysis. *Plos One* 2012;**7**:e43994.
25. Son BH, Ahn SH, Kim SW, Kang E, Park SK, Lee MH, Noh WC, Kim LS, Jung Y, Kim KS, Noh DY, Moon BI, Suh YJ, Lee JE, Choi DH, Kim SY, Jung SH, Yom CK, Lee H, Yang JH. Prevalence of BRCA1 and BRCA2 mutations in non-familial breast cancer patients with high risks in Korea: the Korean Hereditary Breast Cancer (KOHBRA) Study. *Breast Cancer Res Treat* 2012;**133**:1143-52.
26. Tang NLS, Pang CP, Yeo W, Choy KW, Lam PK, Suen M, Law LK, King WWK, Johnson P, Hjelm M. Prevalence of mutations in the BRCA1 gene among Chinese patients with breast cancer. *J Natl Cancer Inst* 1999;**91**:882-85.
27. Kawahara M, Sakayori M, Shiraishi K, Nomizu T, Takeda M, Abe R, Ohuchi N, Takenoshita S, Ishioka C. Identification and evaluation of 55 genetic variations in the BRCA1 and the BRCA2 genes of patients from 50 Japanese breast cancer families. *J Hum Genet* 2004;**49**:391-95.
28. Patmasiriwat P, Bhothisuwan K, Sinilnikova OM, Chopin S, Methakijvaroon S, Badzioch M, Padungsutt P, Vattanaviboon P, Vattanasapt V, Szabo C, Saunders GF, Goldgar D, Lenoir GM. Analysis of breast cancer susceptibility genes BRCA1 and BRCA2 in Thai familial and isolated early-onset breast and ovarian cancer. *Hum Mutat* 2002;**20**:230.
29. De Silva W, Karunanayake EH, Tennekoon KH, Allen M, Amarasinghe I, Angunawala P, Ziard MH. Novel sequence variants and a high frequency of recurrent polymorphisms in BRCA1 gene in Sri Lankan breast cancer patients and at risk individuals. *BMC Cancer* 2008;**8**:214.
30. Kumar BV, Lakhotia S, Ankathil R, Madhavan J, Jayaprakash PG, Nair MK, Somasundaram K. Germline BRCA1 mutation analysis in Indian breast/ovarian cancer families. *Cancer Biol Ther* 2002;**1**:18-21.
31. Saleh-Gohari N, Mohammadi-Anaie M, Kalantari-Khandani B. BRCA1 Gene Mutations in Breast Cancer Patients from Kerman Province, Iran. *Iranian journal of cancer prevention* 2012;**5**:210-5.

32. Zhang J, Pei RG, Pang ZY, Ouyang T, Li JF, Wang TF, Fan ZQ, Fan T, Lin BY, Xie YT. Prevalence and characterization of BRCA1 and BRCA2 germline mutations in Chinese women with familial breast cancer. *Breast Cancer Res Treat* 2012;**132**:421-28.
33. Ikeda N, Miyoshi Y, Yoneda K, Shiba E, Sekihara Y, Kinoshita M, Noguchi S. Frequency of BRCA1 and BRCA2 germline mutations in Japanese breast cancer families. *Int J Cancer* 2001;**91**:83-88.
34. Ahmad J, Le Calvez-Kelm F, Daud S, Voegelé C, Vallee M, Ahmad A, Kakar N, McKay JD, Gaborieau V, Leone M, Sinilnikova O, Sangrajang S, Tavtigian SV, Lesueur F. Detection of BRCA1/2 mutations in breast cancer patients from Thailand and Pakistan. *Clin Genet* 2012;**82**:594-98.
35. Sng JH, Chang J, Feroze F, Rahman N, Tan W, Lim S, Lehnert M, van der Pool S, Wong J. The prevalence of BRCA1 mutations in Chinese patients with early onset breast cancer and affected relatives. *Brit J Cancer* 2000;**82**:538-42.
36. Zhi X, Szabo C, Chopin S, Suter N, Wang QS, Ostrander EA, Sinilnikova OM, Lenoir GM, Goldgar D, Shi YR. BRCA1 and BRCA2 sequence variants in Chinese breast cancer families. *Hum Mutat* 2002;**20**:474.
37. Moslehi R, Solehdin F, Malik I, Narod S. Analysis of BRCA1 mutations in a Pakistani family with hereditary breast and ovarian cancer syndrome. *Am J Med Genet* 1998;**78**:386-7.
38. Keshavarzi F, Javadi GR, Zeinali S. BRCA1 and BRCA2 germline mutations in 85 Iranian breast cancer patients. *Fam Cancer* 2012;**11**:57-67.
39. Ou JH, Wu T, Sijmons R, Ni D, Xu WT, Upur H. Prevalence of BRCA1 and BRCA2 Germline Mutations in Breast Cancer Women of Multiple Ethnic Region in Northwest China. *J Breast Cancer* 2013;**16**:50-54.
40. Chen WQ, Pan KF, Ouyang T, Li JF, Wang TF, Fan ZQ, Fan T, Lin BY, Lu YY, You WC, Xie YT. BRCA1 germline mutations and tumor characteristics in Chinese women with familial or early-onset breast cancer. *Breast Cancer Res Treat* 2009;**117**:55-60.
41. Khoo US, Chan KY, Cheung AN, Xue WC, Shen DH, Fung KY, Ngan HY, Choy KW, Pang CP, Poon CS, Poon AY, Ozcelik H. Recurrent BRCA1 and BRCA2 germline mutations in ovarian cancer: a founder mutation of BRCA1 identified in the Chinese population. *Hum Mutat* 2002;**19**:307-8.
42. Khoo AS, Balraj P, Volpi L, Nair S. A new BRCA1 germline mutation (E879X) in a Malaysian breast cancer patient of Chinese descent. *Hum Mutat* 2000;**15**:485.
43. Sng JH, Ali AB, Lee SC, Zahar D, Wong JEL, Blake V, Sharif A, Cross G, Iau PTC. BRCA1 c.2845insA is a recurring mutation with a founder effect in Singapore Malay women with early onset breast/ovarian cancer. *J Med Genet* 2003;**40**.

44. John EM, Miron A, Gong G, Phipps AI, Felberg A, Li FP, West DW, Whittemore AS. Prevalence of pathogenic BRCA1 mutation carriers in 5 US racial/ethnic groups. *JAMA* 2007;**298**:2869-76.
45. Manguoglu AE, Luleci G, Ozcelik T, Colak T, Schayek H, Akaydin M, Friedman E. Germline mutations in the BRCA1 and BRCA2 genes in Turkish breast/ovarian cancer patients. *Hum Mutat* 2003;**21**:444-5.
46. Laitman Y, Simeonov M, Herskovitz L, Kushnir A, Shimon-Paluch S, Kaufman B, Zidan J, Friedman E. Recurrent germline mutations in BRCA1 and BRCA2 genes in high risk families in Israel. *Breast Cancer Res Treat* 2012;**133**:1153-57.
47. Elit L, Jack E, Kwan E, Baigal G, Narod S. A unique BRCA1 mutation identified in Mongolia. *Int J Gynecol Cancer* 2001;**11**:241-43.
48. Valarmathi MT, A A, Deo SS, Shukla NK, Das SN. BRCA1 germline mutations in Indian familial breast cancer. *Hum Mutat* 2003;**21**:98-9.
49. Kadouri L, Bercovich D, Elimelech A, Lerer I, Sagi M, Glusman G, Shochat C, Korem S, Hamburger T, Nissan A, Abu-Halaf N, Badrriyah M, Abeliovich D, Peretz T. A novel BRCA-1 mutation in Arab kindred from east Jerusalem with breast and ovarian cancer. *BMC Cancer* 2007;**7**:14.
50. Rajkumar T, Soumitra N, Nancy NK, Swaminathan R, Sridevi V, Shanta V. BRCA1, BRCA2 and CHEK2 (1100 del C) germline mutations in hereditary breast and ovarian cancer families in South India. *Asian Pac J Cancer Prev* 2003;**4**:203-8.
51. Lim YK, Lau PTC, Ali AB, Lee SC, Wong JEL, Putti TC, Sng JH. Identification of novel BRCA large genomic rearrangements in Singapore Asian breast and ovarian patients with cancer. *Clin Genet* 2007;**71**:331-42.
52. Purnomosari D, Pals G, Wahyono A, Aryandono T, Manuaba TW, Haryono SJ, van Diest PJ. BRCA1 and BRCA2 germline mutation analysis in the Indonesian population. *Breast Cancer Res Treat* 2007;**106**:297-304.
53. De Leon Matsuda ML, Liede A, Kwan E, Mapua CA, Cutiongco EM, Tan A, Borg A, Narod SA. BRCA1 and BRCA2 mutations among breast cancer patients from the Philippines. *Int J Cancer* 2002;**98**:596-603.
54. Kang E, Park SK, Yang JJ, Park B, Lee MH, Lee JW, Suh YJ, Lee JE, Kim HA, Oh SJ, Kim SW, Korean Breast Canc Soc. Accuracy of BRCA1/2 mutation prediction models in Korean breast cancer patients. *Breast Cancer Res Treat* 2012;**134**:1189-97.
55. Kuo WH, Lin PH, Huang AC, Chien YH, Liu TP, Lu YS, Bai LY, Sargeant AM, Lin CH, Cheng AL, Hsieh FJ, Hwu WL, Chang KJ. Multimodel assessment of BRCA1 mutations in

Taiwanese (ethnic Chinese) women with early-onset, bilateral or familial breast cancer. *J Hum Genet* 2012;**57**:130-38.

56. Seong MW, Cho SI, Noh DY, Han W, Kim SW, Park CM, Park HW, Kim SY, Kim JY, Park SS. Comprehensive mutational analysis of BRCA1/BRCA2 for Korean breast cancer patients: evidence of a founder mutation. *Clin Genet* 2009;**76**:152-60.

57. Balci A, Huusko P, Paakkonen K, Launonen V, Uner A, Ekmekci A, Winqvist R. Mutation analysis of BRCA1 and BRCA2 in Turkish cancer families: a novel mutation BRCA2 3414del4 found in male breast cancer. *Eur J Cancer* 1999;**35**:707-10.

58. De Silva S, Tennekoon KH, Karunanayake EH, De Silva W, Amarasinghe I, Angunawela P. Novel sequence variants and common recurrent polymorphisms of BRCA2 in Sri Lankan breast cancer patients and a family with BRCA1 mutations. *Exp Ther Med* 2011;**2**:1163-70.

59. El-Harith EHA, Abdel-Hadi MS, Steinmann D, Dork T. BRCA1 and BRCA2 mutations in breast cancer patients from Saudi Arabia. *Saudi Med J* 2002;**23**:700-04.

60. Li SSL, Tseng HM, Yang TP, Liu CH, Teng SJ, Huang HW, Chen LM, Kao HW, Chen JH, Tseng JN, Chen A, Hou MF, Huang TJ, Chang HT, Mok KT, Tsai JH. Molecular characterization of germline mutations in the BRCA1 and BRCA2 genes from breast cancer families in Taiwan. *Hum Genet* 1999;**104**:201-04.

61. Ozdag H, Tez M, Sayek I, Muslumanoglu M, Tarcan O, Icli F, Ozturk M, Ozcelik T. Germ line BRCA1 and BRCA2 gene mutations in Turkish breast cancer patients. *Eur J Cancer* 2000;**36**:2076-82.

62. Lerer I, Wang T, Peretz T, Sagi M, Kaduri L, Orr-Urtreger A, Stadler J, Gutman H, Abeliovich D. The 8765delAG mutation in BRCA2 is common among Jews of Yemenite extraction. *Am J Hum Genet* 1998;**63**:272-4.

63. Egeli U, Cecener G, Tunca B, Tasdelen I. Novel germline BRCA1 and BRCA2 mutations in Turkish women with breast and/or ovarian cancer and their relatives. *Cancer Invest* 2006;**24**:484-91.

64. Han SH, Lee KR, Lee DG, Kim BY, Lee KE, Chung WS. Mutation analysis of BRCA1 and BRCA2 from 793 Korean patients with sporadic breast cancer. *Clin Genet* 2006;**70**:496-501.
